# Supplementary material for: Orthohantavirus diversity in Central-East Argentina: Insights from complete genomic sequencing on phylogenetics, Geographic patterns and transmission scenarios
Source: PubMed Central journal article supplement (PMC11493241; doi:10.1371/journal.pntd.0012465), 2024-10-09
Supplement: pntd.0012465.s003.pdf [file pntd.0012465.s003.pdf]

|            |             |             |             |             |             |             |
|------------|-------------|-------------|-------------|-------------|-------------|-------------|
|            | ..... ..... | ..... ..... | ..... ..... | ..... ..... | ..... ..... | ..... ..... |
|            | 5           | 15          | 25          | 35          | 45          | 55          |
| SNV NM H10 | tagtagtaga  | ctccttgaga  | agctactacg  | actaaagctg  | gaatgagcac  | cctcaaagaa  |
| RIOMV HTN- | tagtagtaga  | ctccttgaga  | agctactatt  | acataagctg  | tgatgagcaa  | cctccaagaa  |
| LANV 510B  | tagtagtaga  | ctccttgaga  | agctactatt  | acataagctg  | tgatgagcaa  | cctccaagaa  |
| CHOV 588   | tagtagtaga  | ctccttgaga  | agctactatg  | actaaagctg  | gaatgagcac  | cctcaaagaa  |
| JABV AKM96 | tagtagtaga  | ctccttgaga  | agctactact  | acgtaagctg  | aatgagcaa   | cctccaagac  |
| MAPV HV-97 | tagtagtaga  | ctccttgaga  | agctactgct  | acaaaagctg  | tgatgagcaa  | cctccaagaa  |
| JUQV oln19 | tagtagtaga  | ctccttgata  | agctactact  | gcaaaagctg  | gaatgagcaa  | cctccaagac  |
| JUQV LH    | tagtagtaga  | ctccttgata  | agctactact  | acaaaagctg  | gaatgagcaa  | cctccaagac  |
| PERV 14403 | tagtagtaga  | ctccttgaga  | agctactact  | gcaaaagctg  | gaatgagcac  | cctccaagaa  |
| MACV 13796 | tagtagtaga  | ctccttgata  | agctactgct  | gtaaaagctg  | gaatgagcaa  | cctccaagaa  |
| ORNV O1229 | tagtagtaga  | ctccttgaga  | agctactact  | gcgaaagctg  | gaatgagcac  | cctccaagaa  |
| ORNV AND N | tagtagtaga  | ctccttgaga  | agctactact  | gcgaaagctg  | gaatgagcac  | cctccaagaa  |
| LECV BMJ-N | --gtagtaga  | ctccttgaga  | agctactact  | gcgaaagctg  | gaatgagcac  | cctccaagaa  |
| LECV BMJ-O | -agtagtaga  | ctccttgaga  | agctactact  | gcgaaagctg  | gaatgagcac  | cctccaagaa  |
| LECV Plata | tagtagtaga  | ctccttgaga  | agctactgct  | gctaaagctg  | gaatgagcac  | cctccaagaa  |
| LECV CO22- | tagtagtaga  | ctccttgaga  | agctactact  | gcgaaagctg  | gaatgagcac  | cctccaagaa  |
| LECV BA18- | -----       | --ccttgaga  | agctactact  | gcgaaagctg  | gaatgagcac  | cctccaagaa  |
| LECV BA18- | -----       | -----       | -----t      | gcgaaagctg  | gaatgagcac  | cctccaagaa  |
| LECV ER19- | ----agtaga  | ctccttgaga  | agctactact  | gcgaaagctg  | gaatgagcac  | cctccaagaa  |
| LECV 22819 | tagtagtaga  | ctccttgaga  | agctactact  | gcgaaagctg  | gaatgagcac  | cctccaagaa  |
| BAV BA10-A | -----       | -----       | -----       | ---aaagctg  | gaatgagcac  | cctccaagaa  |
| BAV BA16-L | -----       | -tccttgaga  | agctactact  | gcaaaaagctg | gaatgagcac  | cctccaagaa  |
| BAV BA02-C | -----       | -----       | -----       | ---aaagctg  | gaatgagcac  | cctccaagaa  |
| BAV BA17-S | -----       | -----       | -----       | -----       | -----ac     | cctccaagaa  |
| BAV BA11-A | -----       | -----       | -----       | -----       | --atgagcac  | cctccaagaa  |
| BAV BA02-C | ----gtaga   | ctccttgaga  | agctactact  | gcaaaaagctg | gaatgagcac  | cctccaagaa  |
| BAV BA02-C | ----agtaga  | ctccttgaga  | agctactact  | gcaaaaagctg | gaatgagcac  | cctccaagaa  |
| BAV BA02-C | -----       | ---ccttgaga | agctactact  | gcaaaaagctg | gaatgagcac  | cctccaagaa  |
| BAV Hu3969 | ---tagtaga  | ctccttgaga  | agctactact  | gcaaaaagctg | gaatgagcac  | cctccaagaa  |
| ANDV CHI-9 | cagtagtaga  | ctccttgaga  | agctactgct  | gcgaaagctg  | gaatgagcac  | cctccaagaa  |
| ANDV AREB1 | tagtagtaga  | ctccttgaga  | agctactgct  | gcgaaagctg  | gaatgagcac  | cctccaagaa  |
| ANDV Epuye | -----       | ctccttgaga  | agctactgct  | gcgaaagctg  | gaatgagcac  | cctccaagaa  |
| ANDV Epili | -----taga   | ctccttgaga  | agctactgct  | gcgaaagctg  | gaatgagcac  | cctccaagaa  |
| ANDV NRC-2 | -----       | ctccttgaga  | agctactgct  | gcgaaagctg  | gaatgagcac  | cctccaagaa  |
| ANDV NRC-4 | -----ga     | ctccttgaga  | agctactgct  | gcgaaagctg  | gaatgagcac  | cctccaagaa  |
| ANDV NRC-6 | tagtagtaga  | ctccttgaga  | agctactgct  | gcgaaagctg  | gaatgagcac  | cctccaagaa  |

|            |             |             |             |             |             |             |
|------------|-------------|-------------|-------------|-------------|-------------|-------------|
|            | ..... ..... | ..... ..... | ..... ..... | ..... ..... | ..... ..... | ..... ..... |
|            | 65          | 75          | 85          | 95          | 105         | 115         |
| SNV NM H10 | gtgcaagaca  | acatcactct  | ccacgaacaa  | caactcgtga  | ctgccaggca  | gaagctcaaa  |
| RIOMV HTN- | gtacaggaag  | gtatcactct  | tcatgaacaa  | cagcttggtg  | cagcccgcc   | gaagcttaag  |
| LANV 510B  | gtacaggaag  | gtatcactct  | tcatgaacaa  | cagcttggtg  | cagcccgcc   | gaagcttaag  |
| CHOV 588   | gtgcaggaaa  | atatcaccct  | acatgaacag  | cagcttggtg  | ctgcacggca  | aaagcttaaa  |
| JABV AKM96 | gtgcaagaaa  | acatcacact  | acacgagcag  | cagctcgtga  | ctgctcgtca  | aaagcttaaaa |
| MAPV HV-97 | atacaggaaa  | acatcacagt  | acacgaacag  | caattagttg  | ctgctcggca  | aaaacttaaa  |
| JUQV oln19 | attcaagata  | gtatcacagt  | acacgaacaa  | cagctcgtga  | ctgccaggca  | aaaacttaaa  |
| JUQV LH    | atccaagaca  | gcatcacagt  | acacgaacaa  | cagctcgtga  | ctgccaggca  | gaagcttaaa  |
| PERV 14403 | ttgcaggaaa  | atatcaccgc  | acacgaacaa  | catctcgtca  | ctgccaggca  | gaaacttaaa  |
| MACV 13796 | ttgcaagaga  | atatcactgc  | acacgaacaa  | caactcgtga  | ctgccaggca  | gaagctgaaa  |
| ORNV O1229 | ctacaggaaa  | atatcacagc  | acacgaacaa  | cagctcgtga  | ctgctcggca  | aaagcttaaa  |
| ORNV AND N | ctacaggaaa  | atatcacagc  | acacgaacaa  | cagctcgtga  | ctgctcggca  | aaagcttaaa  |
| LECV BMJ-N | ttacaagaaa  | acatcacagc  | acacgaacag  | cagctcgtga  | ctgctcggca  | aaagcttaaa  |
| LECV BMJ-O | ttacaagaaa  | atatcacagc  | acacgaacaa  | cagctcgtga  | ctgctcggca  | aaagctcaaa  |
| LECV Plata | ttacaagaaa  | atatcacagc  | acacgaacaa  | cagctcgtga  | ctgctcggca  | aaagcttaaa  |
| LECV CO22- | ttacaagaaa  | gtatcacagc  | acacgaacaa  | cagctcgtga  | ctgctcggca  | aaagcttaaa  |
| LECV BA18- | ttacaagaaa  | atatcacagc  | acacgaacaa  | cagctcgtga  | ctgctcggca  | aaagcttaaa  |
| LECV BA18- | ttacaagaaa  | atatcacagc  | acacgaacaa  | cagctcgtga  | ctgctcggca  | aaagcttaaa  |
| LECV ER19- | ttacaagaaa  | atatcacagc  | acacgaacaa  | cagctcgtga  | ctgctcggca  | aaagcttaaa  |
| LECV 22819 | ttacaagaaa  | atatcacagc  | acacgaacaa  | cagctcgtga  | ctgctcggca  | aaagcttaaa  |
| BAV BA10-A | ttacaagaaa  | atatcacagc  | acacgaacag  | cagctcgtga  | ctgctcggca  | aaagcttaaa  |

|            |            |            |            |            |            |            |
|------------|------------|------------|------------|------------|------------|------------|
| BAV BA16-L | ttacaagaaa | atatcacagc | acacgaacaa | cagctcgtga | ctgctcggca | aaagcttaaa |
| BAV BA02-C | ttacaagaaa | atatcacagc | acacgaacaa | cagctcgtga | ctgctcggca | aaagcttaaa |
| BAV BA17-S | ttacaagaaa | atatcacagc | acacgaacaa | cagctcgtga | ctgctcggca | aaagctcaaa |
| BAV BA11-A | ttacaagaaa | atatcacagc | acacgaacaa | cagctcgtga | ctgctcggca | aaagctcaaa |
| BAV BA02-C | ttacaagaaa | atatcacagc | acacgaacaa | cagctcgtga | ctgctcggca | aaagcttaaa |
| BAV BA02-C | ttacaagaaa | atatcacagc | acacgaacaa | cagctcgtga | ctgctcggca | aaagcttaaa |
| BAV BA02-C | ttacaagaaa | atatcacagc | acacgaacaa | cagctcgtga | ctgctcggca | aaagcttaaa |
| BAV Hu3969 | ttacaagaaa | atatcacagc | acacgaacaa | cagctcgtga | ctgctcggca | aaagcttaaa |
| ANDV CHI-9 | ttgcaggaaa | acatcacagc | acacgaacaa | cagctcgtga | ctgctcggca | aaagcttaag |
| ANDV AREB1 | ttacaagaaa | acatcacagc | acacgaacaa | cagctcgtga | ctgctcggca | aaagcttaaa |
| ANDV Epuye | ctacaagaaa | acatcacagc | acacgaacaa | cagctcgtga | ctgctcggca | aaagcttaaa |
| ANDV Epili | ttacaagaaa | acatcacagc | acacgaacaa | cagctcgtga | ctgctcggca | aaagcttaaa |
| ANDV NRC-2 | ttacaagaaa | acatcacagc | acacgaacaa | cagctcgtga | ctgctcggca | aaagcttaaa |
| ANDV NRC-4 | ttacaagaaa | acatcacagc | acacgaacaa | cagctcgtga | ctgctcggca | aaagcttaaa |
| ANDV NRC-6 | ttacaagaaa | acatcacagc | acacgaacaa | cagctcgtga | ctgctcggca | aaagcttaaa |

|           |           |           |           |           |           |           |
|-----------|-----------|-----------|-----------|-----------|-----------|-----------|
| .... .... | .... .... | .... .... | .... .... | .... .... | .... .... | .... .... |
| 125       | 135       | 145       | 155       | 165       | 175       |           |

|            |            |             |            |            |             |             |
|------------|------------|-------------|------------|------------|-------------|-------------|
| SNV NM H10 | gatgcagaaa | gagcgggtgga | attggacccc | gatgatgtta | acaaaagcac  | attacagagc  |
| RIOMV HTN- | gatgccgaga | aagcagttga  | agtggaccca | gatgacgtta | acaagagcac  | actacaaagc  |
| LANV 510B  | gatgccgaga | aagcagttga  | agtggaccca | gatgacgtta | acaagagcac  | actacaaagc  |
| CHOV 588   | gatgccgaga | gagcaattga  | agtggacccg | gatgaagtta | acaaaagtac  | actacagggg  |
| JABV AKM96 | gatgcagaaa | aggcgggtgga | tgcagaccca | gatgatgtca | ataaaaagtac | acttcaaagt  |
| MAPV HV-97 | gatgccgaga | aggcagttgga | ggtggaccca | gatgacgtta | ataagagcac  | attacaaaac  |
| JUQV oIn19 | gatgccgaga | aagcagttgga | ggtggaccca | gatgacgtta | acaagagcac  | attacaaagc  |
| JUQV LH    | gatgccgaga | aagcagttgga | ggtggaccca | gatgacgtta | acaagagcac  | attacaaagc  |
| PERV 14403 | gatgccgaga | agaccgtgga  | agtggaccca | gatgaagtca | acaagagcac  | attacaaagt  |
| MACV 13796 | gatgcagaaa | aagccgtgga  | cgtggaccca | gatgaggtta | acaagagtac  | actacaaaggt |
| ORNV O1229 | gatgccgaaa | agacggtgga  | ggtggacccg | gatgaggtta | acaagagcac  | attacaaagt  |
| ORNV AND N | gatgccgaaa | agacggtgga  | ggtggacccg | gatgaggtta | acaagagcac  | attacaaagt  |
| LECV BMJ-N | gatgccgaaa | agacggtgga  | ggtggacccg | gatgaggtta | acaagagcac  | actacaaagt  |
| LECV BMJ-O | gatgccgaaa | agacggtgga  | ggtggacccg | gatgaggtta | acaagagcac  | actacaaagt  |
| LECV Plata | gatgccgaga | agacggtgga  | ggtggacccg | gatgaggtta | acaagagcac  | actacaaagt  |
| LECV CO22- | gatgccgaaa | agacggtgga  | ggtggacccg | gatgaggtta | acaagagcac  | actacaaagt  |
| LECV BA18- | gatgccgaaa | agacggtgga  | ggtggacccg | gatgaggtta | acaagagcac  | actacaaagt  |
| LECV BA18- | gatgccgaaa | agacggtgga  | ggtggacccg | gatgaggtta | acaagagcac  | actacaaagt  |
| LECV ER19- | gatgccgaaa | agacggtgga  | ggtggacccg | gatgaggtta | acaagagcac  | actacaaagt  |
| LECV 22819 | gatgccgaaa | agacggtgga  | ggtggacccg | gatgaggtta | acaagagcac  | actacaaagt  |
| BAV BA10-A | gatgccgaaa | agacggtgga  | ggtggacccg | gatgaggtta | acaagagcac  | actacaaagt  |
| BAV BA16-L | gatgccgaaa | agacggtgga  | ggtggacccg | gatgaggtta | acaagagcac  | actacaaagt  |
| BAV BA02-C | gatgccgaaa | agacggtgga  | ggtggacccg | gatgaggtta | acaagagcac  | actacaaagt  |
| BAV BA17-S | gatgccgaaa | agacggtgga  | ggtggacccg | gatgaggtta | acaagagcac  | actacaaagt  |
| BAV BA11-A | gatgccgaaa | agacggtgga  | ggtggacccg | gatgaggtta | acaagagcac  | actacaaagt  |
| BAV BA02-C | gatgccgaaa | agacggtgga  | ggtggacccg | gatgaggtta | acaagagcac  | actacaaagt  |
| BAV BA02-C | gatgccgaaa | agacggtgga  | ggtggacccg | gatgaggtta | acaagagcac  | actacaaagt  |
| BAV BA02-C | gatgccgaaa | agacggtgga  | ggtggacccg | gatgaggtta | acaagagcac  | actacaaagt  |
| BAV Hu3969 | gatgccgaaa | agacggtgga  | ggtggacccg | gatgaggtta | acaagagcac  | actacaaagt  |
| ANDV CHI-9 | gatgccgaga | aggcagttgga | ggtggacccg | gatgacgtta | acaagagcac  | actacaaaat  |
| ANDV AREB1 | gatgccgaga | aggcgggtgga | ggtggacccg | gatgacgtta | acaagagcac  | attacaaagt  |
| ANDV Epuye | gatgccgaga | aggcgggtgga | ggtggacccg | gatgacgtta | acaagagcac  | attacaaagt  |
| ANDV Epili | gatgccgaga | aggcgggtgga | ggtggacccg | gatgacgtta | acaagagcac  | actacaaagt  |
| ANDV NRC-2 | gatgccgaga | aggcgggtgga | ggtggacccg | gatgacgtta | acaagagcac  | actacaaagt  |
| ANDV NRC-4 | gatgccgaga | aggcgggtgga | ggtggacccg | gatgacgtta | acaagagcac  | actacaaagt  |
| ANDV NRC-6 | gatgccgaga | aggcgggtgga | ggtggacccg | gatgacgtta | acaagagcac  | attacaaagt  |

|           |           |           |           |           |           |           |
|-----------|-----------|-----------|-----------|-----------|-----------|-----------|
| .... .... | .... .... | .... .... | .... .... | .... .... | .... .... | .... .... |
| 185       | 195       | 205       | 215       | 225       | 235       |           |

|            |             |            |            |            |             |            |
|------------|-------------|------------|------------|------------|-------------|------------|
| SNV NM H10 | agacgggcag  | ctgtgtctgc | attggagacc | aaactcggag | aacttaagcg  | ggaactggct |
| RIOMV HTN- | agacgggcag  | ctgtgtctgc | attggagaat | aaactcgcag | aactcaagag  | gcagttggca |
| LANV 510B  | agacgggcag  | ctgtgtctgc | attggagaat | aaactcgcag | aactcaagag  | gcagttggca |
| CHOV 588   | agaagggcag  | ctgtgtctac | actggaaacc | aagctcggag | aactcaaaaag | gcagctggca |
| JABV AKM96 | agaaagggcag | cagtttctgc | tcttgagaca | aaattagggg | agctgaaaag  | acaactggct |
| MAPV HV-97 | agacgggcag  | ctgtgtctac | attggagagt | aaactcgggg | aactcaaaaag | gcaactggca |
| JUQV oIn19 | agacgggcag  | ctgtgtctac | attggagact | aaactcgggg | aactcaagcg  | gcaactggca |

|            |            |            |            |            |            |            |
|------------|------------|------------|------------|------------|------------|------------|
| JUQV LH    | agacgggcag | ctgtgtctac | attggagact | aaactcgggg | aactcaagcg | acaactggca |
| PERV 14403 | agacgggcgg | ctgtgtctac | attggagacc | aaacttggag | agctcaagag | gcagcttgca |
| MACV 13796 | cgacgggcag | ctgtgtcaac | attggagacc | aaacttggag | agctcaagag | acagcttgct |
| ORNV 01229 | agacgggcag | ctgtgtctac | attggagacc | aaactcggag | aacttaagag | gcagcttgcg |
| ORNV AND N | agacgggcag | ctgtgtctac | attggagacc | aaactcggag | aacttaagag | gcagcttgcg |
| LECV BMJ-N | agacgggcag | ctgtgtctac | attggagacc | aaactcgggg | aactcaagag | acaacttgca |
| LECV BMJ-O | agacgggcag | ctgtgtctac | attggagacc | aagctcgggg | aactcaagag | acaacttgca |
| LECV Plata | agacgggcag | ctgtgtctac | attggagacc | aaactcgggg | aacttaagag | acaacttgca |
| LECV CO22- | agacgggcag | ctgtgtctac | actggagacc | aaacttgggg | aactcaagag | acaacttgca |
| LECV BA18- | agacgggcag | ctgtgtctac | actggagacc | aaacttgggg | aactcaagag | acaacttgcc |
| LECV BA18- | agacgggcag | ctgtgtctac | actggagacc | aaactcgggg | aactcaagag | acaacttgcc |
| LECV ER19- | agacgggcag | ctgtgtctac | actggagacc | aaactcgggg | aactcaagag | acaacttgca |
| LECV 22819 | agacgggcag | ctgtgtctac | actggagacc | aaactcgggg | aactcaagag | acaacttgca |
| BAV BA10-A | agacgggcag | ctgtgtctac | attggagacc | aaactcggag | aactcaagag | gcagcttgcc |
| BAV BA16-L | agacgggcag | ctgtgtctac | attggagacc | aaactcggag | aactcaagag | gcagcttgcc |
| BAV BA02-C | agacgggcag | ctgtgtctac | attggagacc | aaactcggag | aactcaagag | gcagcttgcc |
| BAV BA17-S | agacgggcag | ctgtgtctac | attggagacc | aaactcggag | aactcaagag | gcagcttgcc |
| BAV BA11-A | agacgggcag | ctgtgtctac | attggagacc | aaactcggag | aactcaagag | gcagcttgcc |
| BAV BA02-C | agacgggcag | ctgtgtctac | attggagacc | aaactcggag | aactcaagag | gcagcttgcc |
| BAV BA02-C | agacgggcag | ctgtgtctac | attggagacc | aaactcggag | aactcaagag | gcagcttgcc |
| BAV BA02-C | agacgggcag | ctgtgtctac | attggagacc | aaactcggag | aactcaagag | gcagcttgcc |
| BAV Hu3969 | cgacgggcag | ctgtgtctac | attggagacc | aaactcggag | aactcaagag | gcagcttgcc |
| ANDV CHI-9 | agacgggcag | ctgtgtctac | attggagacc | aaactcggag | aacttaagag | gcaacttgca |
| ANDV AREB1 | agacgggcag | ctgtgtctac | attggagacc | aaactcgggg | aactcaagag | gcaacttgcg |
| ANDV Epuye | agacgggcag | ctgtgtctac | attggagacc | aaactcgggg | aactcaagag | gcaacttgcg |
| ANDV Epili | agacgggcag | ctgtgtctac | attggagacc | aaactcgggg | aactcaagag | gcaacttgcg |
| ANDV NRC-2 | agacgggcag | ctgtgtctac | attggagacc | aaactcgggg | aactcaagag | gcaacttgca |
| ANDV NRC-4 | agacgggcag | ctgtgtctac | actggagacc | aaactcgggg | aactcaagag | gcaacttgca |
| ANDV NRC-6 | agacgggcag | ctgtgtctac | attggagacc | aaactcgggg | aactcaagag | gcaacttgcg |

|            |            |            |            |            |            |            |
|------------|------------|------------|------------|------------|------------|------------|
|            | .... ....  | .... ....  | .... ....  | .... ....  | .... ....  | .... ....  |
|            | 245        | 255        | 265        | 275        | 285        | 295        |
| SNV NM H10 | gatcttattg | cagctcagaa | attggcttca | aaacctggtg | atccaacagg | gattgaacct |
| RIOMV HTN- | gatttggttg | cagctcaaaa | attggctgca | aaaccagttg | atccaacagg | gcttgaacct |
| LANV 510B  | gatttggttg | cagctcaaaa | attggctgca | aaaccagttg | atccaacagg | gcttgaacct |
| CHOV 588   | gatttggtgg | cagctcaaaa | attggcttca | aaaccagttg | atccaacagg | gattgagcct |
| JABV AKM96 | gatctggtag | catctcaaaa | attagcctcc | aaaccagttg | accccacagg | gttagaacct |
| MAPV HV-97 | gatcttgtgg | cagctcagaa | actggcttca | aaaccagttg | atccaacagg | gcttgaacct |
| JUQV oln19 | gatttggttg | cagctcagaa | actggctaca | aaaccagttg | atccaacagg | gcttgaacct |
| JUQV LH    | gatctggttg | cagctcagaa | actggctaca | aaaccagttg | atccaacagg | gcttgaacct |
| PERV 14403 | gatttggtgg | cagctcaaaa | gctggctgca | aagccagttg | atccaacagg | gcttgaacct |
| MACV 13796 | gacttggtgg | cagctcaaaa | actggctaca | aaaccagttg | atccaacagg | gattgagcct |
| ORNV 01229 | gatctggtgg | cagctcaaaa | actggctaca | aaaccagttg | atccaacagg | gcttgaacct |
| ORNV AND N | gatctggtgg | cagctcaaaa | actggctaca | aaaccagttg | atccaacagg | gcttgaacct |
| LECV BMJ-N | gatctggtgg | cagctcaaaa | actggctaca | agaccagttg | atccaacagg | gcttgaacct |
| LECV BMJ-O | gatttggtgg | cagctcaaaa | actggctaca | aaaccagttg | atccaacagg | gcttgaacct |
| LECV Plata | gatttggtgg | cagctcaaaa | actggctaca | aaaccagttg | atccaacagg | gcttgaacct |
| LECV CO22- | gatctggtgg | cagctcaaaa | actggctaca | aaaccagttg | atccaacagg | gcttgaacct |
| LECV BA18- | gatctggtgg | cagctcaaaa | actggctaca | aaaccagttg | atccaacagg | gcttgaacct |
| LECV BA18- | gatctggtgg | cagctcaaaa | actggctaca | aaaccagttg | atccaacagg | gcttgaacct |
| LECV ER19- | gatctggtgg | cagctcaaaa | actggctaca | aaaccagttg | atccaacagg | gcttgaacct |
| LECV 22819 | gatctggtgg | cagctcaaaa | actggctaca | aaaccagttg | atccaacagg | gcttgaacct |
| BAV BA10-A | gatctggtgg | cagctcaaaa | actggctaca | aaaccagttg | atccaacagg | gcttgaacct |
| BAV BA16-L | gatttggtgg | cagctcaaaa | actggctaca | aaaccagttg | atccaacagg | gcttgaacct |
| BAV BA02-C | gatttggtgg | cagctcaaaa | actggctaca | aaaccagttg | atccaacagg | gcttgaacct |
| BAV BA17-S | gatttggtgg | cagctcaaaa | actggctaca | aaaccagttg | atccaacagg | gcttgaacct |
| BAV BA11-A | gatttggtgg | cagctcaaaa | actggctaca | aaaccagttg | atccaacagg | gcttgaacct |
| BAV BA02-C | gatttggtgg | cagctcaaaa | actggctaca | aaaccagttg | atccaacagg | gcttgaacct |
| BAV BA02-C | gatttggtgg | cagctcaaaa | actggctaca | aaaccagttg | atccaacagg | gcttgaacct |
| BAV BA02-C | gatttggtgg | cagctcaaaa | actggctaca | aaaccagttg | atccaacagg | gcttgaacct |
| BAV Hu3969 | gatttggtgg | cagctcaaaa | actggctaca | aaaccagttg | atccaacagg | gcttgaacct |
| ANDV CHI-9 | gatttggtgg | cagctcaaaa | attggctaca | aaaccagttg | atccaacagg | gcttgaacct |
| ANDV AREB1 | gatctggtgg | cagctcaaaa | gttggctaca | aaaccagttg | atccaacagg | gcttgaacct |
| ANDV Epuye | gatctggtgg | cagctcaaaa | gttggctaca | aaaccagttg | atccaacagg | gcttgaacct |

|            |            |            |            |            |            |            |
|------------|------------|------------|------------|------------|------------|------------|
| ANDV Epili | gatctggtgg | cagctcaaaa | gttggctaca | aaaccagttg | atccaacagg | gottgagcct |
| ANDV NRC-2 | gatctggtgg | cagctcaaaa | attggctaca | aaaccagttg | atccaacagg | gottgagcct |
| ANDV NRC-4 | gatctggtgg | cagctcaaaa | attggctaca | aaaccagttg | atccaacagg | gottgagcct |
| ANDV NRC-6 | gatctggtgg | cagctcaaaa | gttggctaca | aaaccagttg | atccaacagg | gottgagcct |

|           |           |           |           |           |           |           |
|-----------|-----------|-----------|-----------|-----------|-----------|-----------|
| .... .... | .... .... | .... .... | .... .... | .... .... | .... .... | .... .... |
| 305       | 315       | 325       | 335       | 345       | 355       |           |

|            |            |            |            |            |            |            |
|------------|------------|------------|------------|------------|------------|------------|
| SNV NM H10 | gatgaccatc | taaaggaaaa | gtcatcattg | agatatggaa | atgtccttga | tgtaaattcc |
| RIOMV HTN- | gatgaccatc | tgaaggaaaa | gtctgctctg | cgttatggaa | atgtccttga | tgtcaatgct |
| LANV 510B  | gatgaccatc | tgaaggaaaa | gtctgctctg | cgttatggaa | atgtccttga | tgtcaatgct |
| CHOV 588   | gatgaccatt | tgaaggaaaa | atctacactt | cgttatggca | atgtccttga | tgtgaactcc |
| JABV AKM96 | gatgaccatc | tgaaggaaaa | atcaacactg | cgatatggaa | atgtcattga | tgtcaactcc |
| MAPV HV-97 | gatgaccatt | tgaaggaaaa | atcatcactg | cgttatggaa | atgtccttga | tgtcaactcg |
| JUQV oln19 | gatgaccatc | taaaggagaa | gtcttcatta | cggtatggca | atgtcatcga | tgtcaacca  |
| JUQV LH    | gatgaccatc | tgaaggagaa | gtcttcctta | cggtatggca | atgtcatcga | tgtcaacca  |
| PERV 14403 | gatgaccatc | tgaaggagaa | atcatctttg | aggtatggga | atgtccttga | tgtcaactcc |
| MACV 13796 | gatgaccatc | tgaaggaaaa | atcatccttg | agatatggga | atgtccttga | tgtcaattct |
| ORNV O1229 | gatgatcatc | tgaagaaaa  | atcatctctc | cgttatggga | atgtccttga | tgtcaactcc |
| ORNV AND N | gatgatcatc | taaaagagaa | atcatctctc | cgttatggga | atgtccttga | tgtcaactcc |
| LECV BMJ-N | gatgatcatc | taaaggaaaa | gtcatcctta | aggtatggca | acgtccttga | tgtcaactcc |
| LECV BMJ-O | gatgatcatc | taaaggaaaa | gtcatcctta | aggtatggca | atgtccttga | tgtcaactcc |
| LECV Plata | gatgatcatc | taaaggaaaa | gtcatccttg | aggtatggca | atgttcttga | tgtcaactcc |
| LECV CO22- | gatgatcatc | taaaggaaaa | gtcatccttg | agatatggca | atgttcttga | tgtcaactcc |
| LECV BA18- | gatgaccatc | taaaggagaa | gtcatccttg | agatatggta | atgttcttga | tgtcaactct |
| LECV BA18- | gatgaccatc | taaaggaaaa | gtcatccttg | agatatggca | atgttcttga | tgtcaactct |
| LECV ER19- | gatgatcatc | taaaggaaaa | gtcatccttg | agatatggca | atgttcttga | tgtcaactct |
| LECV 22819 | gatgatcatc | taaaggaaaa | gtcatccttg | agatatggta | atgttcttga | tgtcaactct |
| BAV BA10-A | gatgatcatt | tgaaggaaaa | gtcatcattg | cgttatggga | atgtgcttga | tgtcaactcc |
| BAV BA16-L | gatgatcatt | tgaaggaaaa | atcatcattg | cgttatggga | atgtacttga | tgtcaactcc |
| BAV BA02-C | gatgatcatt | tgaaggaaaa | atcatcattg | cgttatggaa | atgtgcttga | tgtcaactcc |
| BAV BA17-S | gatgatcatt | tgaaggaaaa | atcatcattg | cgttatggga | atgtgcttga | tgtcaactcc |
| BAV BA11-A | gatgatcatt | tgaaggaaaa | atcatcattg | cgttatggga | atgtgcttga | tgtcaactcc |
| BAV BA02-C | gatgatcatt | tgaaggaaaa | atcatcattg | cgttatggga | atgtgcttga | tgtcaactcc |
| BAV BA02-C | gatgatcatt | tgaaggaaaa | atcatcattg | cgttatggga | atgtgcttga | tgtcaactcc |
| BAV BA02-C | gatgatcatt | tgaaggaaaa | atcatcattg | cgttatggga | atgtgcttga | tgtcaactcc |
| BAV Hu3969 | gatgatcatt | tgaaggaaaa | gtcatcattg | cgttacggga | atgtgcttga | tgtcaactcc |
| ANDV CHI-9 | gatgatcatc | taaaggaaaa | atcatctctg | agatatggga | atgtccttga | tgttaattca |
| ANDV AREB1 | gatgaccatc | tgaagagaaa | atcatctctg | agatatggga | atgtccttga | tgttaactca |
| ANDV Epuye | gatgaccatc | tgaagagaaa | atcatctctg | agatatggga | atgtccttga | tgttaactca |
| ANDV Epili | gatgaccatc | tgaagaaaa  | atcatctctg | agatatggga | atgtccttga | tgttaactca |
| ANDV NRC-2 | gatgaccatc | tgaagagaaa | atcatcctt  | agatatggga | atgtccttga | tgttaactca |
| ANDV NRC-4 | gatgaccatc | tgaagagaaa | atcatctctg | agatatggga | atgtccttga | tgtgaattca |
| ANDV NRC-6 | gatgaccatc | tgaagagaaa | atcatctcta | agatatggga | atgtccttga | tgttaactca |

|           |           |           |           |           |           |           |
|-----------|-----------|-----------|-----------|-----------|-----------|-----------|
| .... .... | .... .... | .... .... | .... .... | .... .... | .... .... | .... .... |
| 365       | 375       | 385       | 395       | 405       | 415       |           |

|            |            |            |             |            |            |            |
|------------|------------|------------|-------------|------------|------------|------------|
| SNV NM H10 | attgacttag | aagagccaag | tgggcaaaca  | gctgattgga | aatccatcgg | actctacatt |
| RIOMV HTN- | attgaccttg | aagaaccgag | tggccaaact  | gccgattgga | aggctatttg | agcctatatt |
| LANV 510B  | attgaccttg | aagaaccgag | tggccaaact  | gccgattgga | aggctatttg | agcctatatt |
| CHOV 588   | attgatcttg | aagagcctag | tgggtcaaaca | gctgattgga | ggatcaattg | tgcttatatc |
| JABV AKM96 | attgacttgg | aagaacctag | tggccagaca  | gcagattgga | gggtcatttg | tgcctacatc |
| MAPV HV-97 | attgatctgg | aagagccaag | tgggcaaaca  | gcagattggt | tgtcaatttg | gatgtacatc |
| JUQV oln19 | attgatctgg | aagagcccag | tggccaaact  | gccgattgga | aagcaatttg | tgcctatata |
| JUQV LH    | attgatctgg | aagaaccag  | tggccagact  | gcagactgga | aagcaatttg | tgcctatata |
| PERV 14403 | attgaccttg | aagaaccgag | tgggtcaaaca | gctgattgga | aagcaatttg | ggcttatata |
| MACV 13796 | attgacctgg | aagaaccaag | tggacaaacc  | gctgactgga | aggctatttg | agcatacata |
| ORNV O1229 | attgatcttg | aagagccaag | tgggtcaaact | gctgattgga | aagctatttg | ggcctacata |
| ORNV AND N | attgatcttg | aagagccaag | tgggtcaaact | gctgattgga | aagctatttg | ggcctacata |
| LECV BMJ-N | attgatctgg | aagaaccaag | tgggcagact  | gccgactgga | ggctatttg  | agcttatata |
| LECV BMJ-O | attgatctgg | aagaaccaag | tggacagact  | gctgattgga | ggctatttg  | ggcttatata |
| LECV Plata | attgatcttg | aagaaccgag | tggacaaact  | gccgattgga | ggctatcgg  | ggcttacata |
| LECV CO22- | attgatctag | aagaaccaag | tggacagact  | gctgattgga | gatctatcgg | ggcttatata |
| LECV BA18- | atcgatctag | aagaaccaag | tggacagact  | gctgattgga | gatctatcgg | ggcatatata |
| LECV BA18- | attgatctag | aagaaccaag | tggacagact  | gctgattgga | gatctatcgg | ggcatatata |

|            |            |            |            |            |            |            |
|------------|------------|------------|------------|------------|------------|------------|
| LECV ER19- | attgatctag | aagaaccaag | tggacagact | gctgattgga | gatctatcgg | ggcatatata |
| LECV 22819 | attgatctag | aagaaccaag | tggacagact | gctgattgga | gatctattgg | ggcatatata |
| BAV BA10-A | attgatttgg | aagaaccaag | tgGCCAAact | gctgattgga | gggctattgg | agcttacata |
| BAV BA16-L | attgatctgg | aagaaccgag | tgGCCAAact | gctgattgga | gggctattgg | agcttacata |
| BAV BA02-C | attgatctgg | aagaaccgag | tgGCCAAact | gctgattgga | gggctattgg | agcttacata |
| BAV BA17-S | attgatctgg | aagaaccgag | tgGCCAAact | gctgattgga | gggctattgg | agcttacata |
| BAV BA11-A | attgatctgg | aggaaccgag | tgGCCagact | gctgattgga | gggctattgg | agcttacata |
| BAV BA02-C | attgatctgg | aagaaccgag | tgGCCAAact | gctgattgga | gggctattgg | agcttacata |
| BAV BA02-C | attgatctgg | aagaaccgag | tgGCCAAact | gctgattgga | gggctattgg | agcttacata |
| BAV BA02-C | attgatctgg | aagaaccgag | tgGCCAAact | gctgattgga | gggctattgg | agcttacata |
| BAV BA02-C | attgatctgg | aagaaccgag | tgGCCAAact | gctgattgga | gggctattgg | agcttacata |
| BAV Hu3969 | attgatctgg | aagaaccaag | tgGCCAAact | gctgactgga | gggctattgg | agcttacata |
| ANDV CHI-9 | attgatttgg | aagaaccgag | tggacagact | gctgattgga | aggctatagg | agcatacatc |
| ANDV AREB1 | attgacttgg | aagaaccgag | tggacagact | gctgattgga | aggctatagg | agcataatc  |
| ANDV Epuye | atcgacttgg | aagaaccgag | tggacagact | gctgattgga | aggctatagg | agcataatc  |
| ANDV Epili | attgacttgg | aagaaccgag | tggacagact | gctgattgga | aggctatagg | agcataatc  |
| ANDV NRC-2 | atcgatttgg | aagaaccgag | tggacagact | gctgattgga | aggctatagg | agcataatc  |
| ANDV NRC-4 | attgatttgg | aagaaccaag | tggacagact | gctgattgga | aggctatagg | agcataatc  |
| ANDV NRC-6 | attgacttgg | aagaaccgag | tggacagact | gctgattgga | aggctatagg | agcataatc  |

|           |           |           |           |           |           |
|-----------|-----------|-----------|-----------|-----------|-----------|
| .... .... | .... .... | .... .... | .... .... | .... .... | .... .... |
| 425       | 435       | 445       | 455       | 465       | 475       |

|            |            |            |            |            |            |            |
|------------|------------|------------|------------|------------|------------|------------|
| SNV NM H10 | ctaagtttgc | cattaccgat | tattcttaa  | gccttgtaca | tggtatctac | taggggccgt |
| RIOMV HTN- | ctaggatttg | taataccaat | tatcctaaag | gcattatata | tgctttcaac | aagagggagg |
| LANV 510B  | ctaggatttg | taataccaat | tatcctaaag | gcattatata | tgctttcaac | aagagggagg |
| CHOV 588   | ctcggatttg | cactaccaat | catcttgaag | gccctctaca | tggtatccac | aagagggagg |
| JABV AKM96 | ttgagctttg | caattccaat | catacttaa  | gctctgtaca | tgctctccac | aagaggaagg |
| MAPV HV-97 | ttgggctttg | ctatcccat  | catattgaag | gcactttaca | tggtatccac | aagagggaga |
| JUQV oIn19 | ttgggctttg | caataccgat | aatacttaa  | gcattgtata | tgctttcaac | ccgagggaga |
| JUQV LH    | ttaggctttg | caataccaat | aatacttaa  | gcactgtaca | tgctttcaac | ccgagggaga |
| PERV 14403 | ctgggatttg | caattccaat | catactgaa  | gcactataca | tggtatccac | ccgtggaagg |
| MACV 13796 | ctgggctttg | caattccgat | catcctaaag | gctttgtaca | tgctgtcaac | ccgtggaagg |
| ORNV O1229 | ttaggatttg | ccataccaat | catcctgaa  | gctctctaca | tgctttccac | ccgtgggaga |
| ORNV AND N | ttaggatttg | ccataccaat | catcctgaa  | gctctctaca | tgctttccac | ccgtgggaga |
| LECV BMJ-N | ctaggctttg | caatcccaat | tatcctaaa  | gccttatata | tgctttctac | cagagggcgg |
| LECV BMJ-O | ctaggctttg | caatcccaat | catcctaaag | gccttgtata | tgctttctac | ccgcgggctt |
| LECV Plata | ctagggtttg | caataccaat | tatcctaaag | gccttgtata | tgctctccac | ccgggggttg |
| LECV CO22- | cttggatttg | caataccgat | tatcctcaag | gccttgtata | tgctttctac | ccgggggctt |
| LECV BA18- | cttggatttg | caataccaat | tatcctcaag | gccctgtata | tgctttctac | ccgggggctt |
| LECV BA18- | cttgggtttg | caataccaat | tatcctcaag | gctttgtata | tgctttctac | ccgggggagg |
| LECV ER19- | cttgggtttg | caataccaat | tatccttaag | gccctgtata | tgctctctac | ccgggggctt |
| LECV 22819 | cttgggtttg | caataccaat | tatcctcaag | gccctatata | tgctttctac | ccgggggctt |
| BAV BA10-A | cttggatttg | ctattcccat | catccttaa  | gctctatata | tgctttccac | tcgtgggcga |
| BAV BA16-L | cttggatttg | ctattcctat | tatccttaa  | gctctatata | tgctttctac | tcgtgggcga |
| BAV BA02-C | cttggatttg | ctattcctat | catccttaa  | gctctatata | tgctttctac | tcgtgggcga |
| BAV BA17-S | cttggatttg | ctattcctat | catccttaa  | gctctatata | tgctttctac | tcgtgggcga |
| BAV BA11-A | cttggatttg | ctattcctat | catccttaa  | gctctatata | tgctttctac | tcgtgggcga |
| BAV BA02-C | cttggatttg | ctattcctat | catccttaa  | gctctatata | tgctttctac | tcgtgggcga |
| BAV BA02-C | cttggatttg | ctattcctat | catccttaa  | gctctatata | tgctttctac | tcgtgggcga |
| BAV BA02-C | cttggatttg | ctattcctat | catccttaa  | gctctatata | tgctttctac | tcgtgggcga |
| BAV Hu3969 | cttggatttg | ctattcctat | catccttaa  | gctctatata | tgctttctac | tcgtgggcga |
| ANDV CHI-9 | ttagggtttg | caattccgat | catcctaaag | gccttatata | tgctgtcaac | ccgtgggaga |
| ANDV AREB1 | ttagggtttg | caattccgat | catactaaa  | gccctatata | tgctgtcaac | ccgcgggaga |
| ANDV Epuye | ttagggtttg | caattccgat | catactaaa  | gccctatata | tgctgtcaac | ccgcgggaga |
| ANDV Epili | ttagggtttg | caattccgat | catactaaa  | gccctatata | tgctgtcaac | ccgcgggaga |
| ANDV NRC-2 | ttagggtttg | caattccgat | catactaaa  | gccctatata | tgctgtcaac | ccgtggaaga |
| ANDV NRC-4 | ttagggtttg | caattccgat | catactaaa  | gccctatata | tgctatcaac | ccgtgggaga |
| ANDV NRC-6 | ttagggtttg | caattccgat | catactaaa  | gccctatata | tgctgtcaac | ccgcgggaga |

|           |           |           |           |           |           |
|-----------|-----------|-----------|-----------|-----------|-----------|
| .... .... | .... .... | .... .... | .... .... | .... .... | .... .... |
| 485       | 495       | 505       | 515       | 525       | 535       |

|            |            |           |            |            |            |             |
|------------|------------|-----------|------------|------------|------------|-------------|
| SNV NM H10 | caaacaatca | aagaaaaca | gggaacaaga | attcgattca | aggatgattc | atccttatgaa |
| RIOMV HTN- | cagactgtta | aagagaaca | agggaccagg | attcgattca | aggatgattc | atcatttgaa  |
| LANV 510B  | cagactgtta | aagagaaca | agggaccagg | attcgattca | aggatgattc | atcatttgaa  |
| CHOV 588   | cagactgtga | aagaaaaca | aggcaccagg | atcagattta | aagatgattc | atccttcgaa  |

|            |             |            |             |            |            |            |
|------------|-------------|------------|-------------|------------|------------|------------|
| JABV AKM96 | cagacagtta  | aagagaataa | agggacaagg  | atcaggttca | aggatgattc | ctcttatgaa |
| MAPV HV-97 | cagacagtaa  | aggaaaacaa | agggaccgg   | atcaggttca | aggatgattc | ctcttttgaa |
| JUQV oln19 | caaacagtga  | aggacaacaa | atctactagg  | attaggttca | aagatgattc | atcattcgag |
| JUQV LH    | cagacagtaa  | aggacaataa | agggactagg  | atcaggttta | aagatgactc | atccttcgaa |
| PERV 14403 | caaacagtta  | aggacaacaa | aggcaccaga  | ataaggttca | aagatgattc | atcctttgaa |
| MACV 13796 | cagacgggtca | aggacaacaa | ggggactaga  | attagattca | aggatgattc | atcctttgaa |
| ORNV 01229 | caaactgtca  | aagacaacaa | ggggactaga  | ataaggttca | aggatgactc | atcatttgaa |
| ORNV AND N | cagactgtca  | aagacaacaa | ggggactaga  | ataaggttca | aggatgactc | atcatttgaa |
| LECV BMJ-N | cagactgtca  | aggacaacaa | agggaccagg  | atacggttca | aggatgattc | atcctttgaa |
| LECV BMJ-O | cagactgtca  | aagacaataa | agggactaga  | atacggttta | aggatgattc | atcatttgaa |
| LECV Plata | cagactgtta  | aggataacaa | agggacaagg  | atacggttca | aggacgactc | atcatttgag |
| LECV CO22- | cagactgtca  | aggacaacaa | agggacaaga  | atacggttta | aagatgattc | atcatttgag |
| LECV BA18- | cagactgtca  | aggacaacaa | agggacaaga  | atccggttta | aagatgattc | atcctttgag |
| LECV BA18- | cagactgtca  | aggacaacaa | agggacaaga  | atccggttta | aagatgattc | atccttcgag |
| LECV ER19- | cagactgtca  | aggacaacaa | agggacaaga  | atccggttta | aagatgattc | atcatttgag |
| LECV 22819 | cagactgtca  | aggacaacaa | agggacaaga  | atccggttta | aagatgattc | ttcatttgag |
| BAV BA10-A | cagactgtca  | aagacaacaa | aggaaaccaga | ataaggttca | aggatgattc | atcatttgag |
| BAV BA16-L | cagactgtca  | aagacaacaa | aggaaaccagg | ataagattta | aggatgactc | atcatttgag |
| BAV BA02-C | cagactgtta  | aagacaacaa | aggaaaccagg | ataagattta | aggatgactc | atcatttgag |
| BAV BA17-S | cagactgtta  | aagacaacaa | aggaaaccagg | ataagattta | aggatgactc | atcatttgag |
| BAV BA11-A | cagactgtta  | aagacaacaa | aggaaaccagg | ataagattta | aggatgactc | atcatttgag |
| BAV BA02-C | cagactgtca  | aagacaacaa | aggaaaccaga | ataagattta | aggatgactc | atcatttgag |
| BAV BA02-C | cagactgtca  | aagacaacaa | aggaaaccaga | ataagattta | aggatgactc | atcatttgag |
| BAV BA02-C | cagactgtca  | aagacaacaa | aggaaaccagg | ataagattta | aggatgactc | atcatttgag |
| BAV Hu3969 | cagactgtca  | aagacaacaa | aggaaaccagg | ataagattca | aagatgactc | atcatttgag |
| ANDV CHI-9 | caaactgtga  | aagacaacaa | agggaccagg  | ataaggttta | aggatgattc | ttcctttgaa |
| ANDV AREB1 | caaactgtga  | aagacaataa | aggaaaccagg | ataagattta | aggatgattc | ttcctttgaa |
| ANDV Epuye | caaactgtga  | aagacaataa | aggaaactagg | ataaggttta | aggatgattc | ttcctttgaa |
| ANDV Epili | caaactgtga  | aagacaataa | aggaaactagg | ataaggttta | aggatgattc | ttcctttgaa |
| ANDV NRC-2 | cagactgtga  | aggacaacaa | aggaaaccagg | ataaggttta | aggatgattc | ttcctttgaa |
| ANDV NRC-4 | cagactgtga  | aagacaacaa | aggaaaccagg | ataaggttta | aggatgattc | ttcctttgaa |
| ANDV NRC-6 | caaactgtga  | aagacaataa | aggaaactagg | ataaggttta | aggatgattc | ttcctttgaa |

|           |           |           |           |           |           |
|-----------|-----------|-----------|-----------|-----------|-----------|
| .... .... | .... .... | .... .... | .... .... | .... .... | .... .... |
| 545       | 555       | 565       | 575       | 585       | 595       |

|            |             |            |             |            |            |            |
|------------|-------------|------------|-------------|------------|------------|------------|
| SNV NM H10 | gaagtcaatg  | ggatacgtaa | gccaaagacat | ctgtatgttt | ctatgccaac | tgcccagtct |
| RIOMV HTN- | gaagtcaatg  | gcatccgaaa | acctaaacac  | ttgtatgtgt | caatgcctac | tgcacaatct |
| LANV 510B  | gaagtcaatg  | gcatccgaaa | acctaaacac  | ttgtatgtgt | caatgcctac | tgcacaatct |
| CHOV 588   | gaggtaaatg  | ggataagaaa | gcctaaacat  | ctttatgtgt | cgatgccac  | tgcacagtca |
| JABV AKM96 | gaaatcaatg  | ggataaggaa | accaaagcat  | ctgtatgtat | ccatgccaac | tgcacaatca |
| MAPV HV-97 | gaagttaatg  | gcatcaggaa | accaaagcat  | ctttatgtct | ctatgccaac | agcacagtca |
| JUQV oln19 | gaagtcaatg  | ggatccggaa | accaaagcat  | ctttatgttt | caatgccaac | tgcacaatcg |
| JUQV LH    | gagggtcaatg | gaatccggaa | accaaagcat  | ctttatgttt | caatgccaac | tgcacaatca |
| PERV 14403 | gagggtcaatg | ggatccggaa | gccgaaacat  | ctttatgttt | caatgccaac | agcacagtcc |
| MACV 13796 | gaagttaaatg | ggattaggaa | gccaaagcat  | ctctacatct | ccatgccgac | tgctcagtcc |
| ORNV 01229 | gagggtcaacg | gtatccggaa | accgaagcat  | ctctatgtgt | caatgccaac | tgcacaatca |
| ORNV AND N | gagggtcaacg | gtatccggaa | accgaagcat  | ctctatgtgt | caatgccaac | tgcacaatca |
| LECV BMJ-N | gagggtcaatg | gcatccgaaa | gcccaagcat  | ttgtatgtat | ccatgccaac | agcacaatca |
| LECV BMJ-O | gagggtcaatg | gcatccgaaa | gcccaagcac  | ttgtatgtgt | ccatgccaac | agcacagtca |
| LECV Plata | gagggttaatg | gcatccgaaa | gcctaagcat  | ctgtatgtgt | ctatgccac  | agcacagtca |
| LECV CO22- | gagggtcaatg | gcatccgaaa | gcctaagcat  | ttgtatgtat | ccatgccac  | agcacaatca |
| LECV BA18- | gagggtcaatg | gcatccgaaa | gcctaaacat  | ttgtatgtat | ccatgccac  | agcacaatca |
| LECV BA18- | gagggtcaacg | gcatccgaaa | gcctaaacat  | ctgtatgtat | ccatgcctac | agcacaatca |
| LECV ER19- | gagggtcaatg | gcatccgaaa | gcctaaacat  | ttgtatgtat | ccatgcctac | agcacaatca |
| LECV 22819 | gagggtcaatg | gcatccgaaa | gcctaaacat  | ttgtatgtat | ccatgcctac | agcacaatca |
| BAV BA10-A | gagggttaatg | gcattaggaa | gcccaaacat  | ttatatgtgt | caatgccaac | agcacaatca |
| BAV BA16-L | gagggttaacg | gcattaggaa | acccaaacat  | ttatatgtgt | caatgccaac | agcacaatca |
| BAV BA02-C | gagggtcaacg | gcattaggaa | gcccaaacat  | ttatatgtgt | caatgccaac | agcacaatca |
| BAV BA17-S | gagggtcaacg | gcattaggaa | gcccaaacat  | ttatatgtgt | caatgccaac | agcacaatca |
| BAV BA11-A | gagggtcaacg | gcattaggaa | gcccaaacat  | ttatatgtgt | caatgccaac | agcacaatca |
| BAV BA02-C | gagggttaacg | gcattaggaa | gcctaaacat  | ttatatgtgt | caatgccaac | agcacaatca |
| BAV BA02-C | gagggttaacg | gcattaggaa | gcctaaacat  | ttatatgtgt | caatgccaac | agcacaatca |
| BAV Hu3969 | gagggtcaacg | gcattaggaa | gcccaagcat  | ttatatgtgt | caatgccaac | agcacaatca |

|            |            |            |             |            |            |            |
|------------|------------|------------|-------------|------------|------------|------------|
| ANDV CHI-9 | gaagtcaatg | ggatacgtaa | acccaaaacac | ctttacgtct | caatgccaac | tgcacagtcc |
| ANDV AREB1 | gaagttaatg | ggatacgtaa | acccaaaacac | ctttatgtct | caatgccgac | tgcacagtct |
| ANDV Epuye | gaagtcaatg | ggatacgtaa | acccaaaacac | ctttatgtct | caatgccgac | tgcacagtct |
| ANDV Epili | gaagtcaatg | ggatacgtaa | acccaaaacac | ctttatgtct | caatgccgac | tgcacagtct |
| ANDV NRC-2 | gaggtcaatg | ggatacgtaa | accgaaacat  | ctttatgtct | caatgccaac | tgcacaatct |
| ANDV NRC-4 | gaggtcaacg | ggatacgtaa | gccgaaacac  | ctttatgtct | caatgccaac | tgcacaatct |
| ANDV NRC-6 | gaagtcaatg | ggatacgtaa | acccaaaacac | ctttatgtct | caatgccgac | tgcacagtct |

|           |           |           |           |           |           |           |
|-----------|-----------|-----------|-----------|-----------|-----------|-----------|
| .... .... | .... .... | .... .... | .... .... | .... .... | .... .... | .... .... |
| 605       | 615       | 625       | 635       | 645       | 655       |           |

|            |            |            |            |             |            |             |
|------------|------------|------------|------------|-------------|------------|-------------|
| SNV NM H10 | acaatgaaag | cagatgagat | tactcccggg | aggttccgta  | caattgcttg | tggattattc  |
| RIOMV HTN- | acaatgaagg | cagatgagat | aacaccgggg | aggtttagga  | caattgcatg | tggcttattt  |
| LANV 510B  | acaatgaagg | cagatgagat | aacaccgggg | aggtttagga  | caattgcatg | tggcttattt  |
| CHOV 588   | acaatgaagg | ctgatgaaat | aacacctgga | aggttccgga  | caattgcatg | tggccttttc  |
| JABV AKM96 | actatgaagg | cagacgagat | aacaccaggg | aggttcagaa  | caattgcttg | tggctctgtt  |
| MAPV HV-97 | actatgaagg | ctgatgagat | aacaccaggg | agatttcgga  | cgattgcctg | tggctctttt  |
| JUQV oln19 | acaatgaagg | ctgaagagat | aacacctggg | cgctttcggg  | cgattgcttg | cggactcttc  |
| JUQV LH    | acaatgaagg | ctgaagagat | aacacctggg | cggtttcgaa  | caattgcttg | tggccttttc  |
| PERV 14403 | acaatgaaag | ctgaagaaat | aacaccaggc | aggtttagaa  | ctattgcttg | tgggcttttc  |
| MACV 13796 | acaatgaaag | ctgaggagat | aacacctggg | aggtttagaa  | cgattgtatg | tggattgttt  |
| ORNV O1229 | acaatgaagg | ctgaagagat | aacacctgga | cggttcagga  | caattgcatg | tggactcttc  |
| ORNV AND N | acaatgaagg | ctgaagagat | aacacctgga | cggttcagga  | caattgcatg | tggactcttc  |
| LECV BMJ-N | acaatgaagg | ctgaggagat | aacaccaggt | agacttagaa  | caattgcatg | tggctctattc |
| LECV BMJ-O | acaatgaagg | ctgaggagat | aacaccaggg | aggttcagaa  | caattgcatg | tggcctcttc  |
| LECV Plata | acaatgaagg | ctgaagaaat | aacaccaggc | agattcagaa  | cgattgcatg | tggctctcttc |
| LECV CO22- | acaatgaagg | ctgaagaaat | aacaccaggc | agattcagaa  | caattgcatg | tggctctcttc |
| LECV BA18- | acaatgaagg | ctgaagagat | aacaccaggc | agattcagaa  | caattgcatg | tggctctttt  |
| LECV BA18- | acaatgaagg | ctgaagagat | aacaccaggc | agattcagaa  | caattgcatg | tggctctttt  |
| LECV ER19- | acaatgaagg | ctgaagagat | aacacctggc | agattcagaa  | caattgcatg | tggctctttt  |
| LECV 22819 | acaatgaagg | ctgaagagat | aacaccaggc | agatttagaa  | caattgcatg | tggctctttt  |
| BAV BA10-A | acaatgaagg | cagaggaaat | aacaccaggt | aggttcagaa  | caattgcatg | tggcctcttc  |
| BAV BA16-L | acaatgaagg | cagaggaaat | aacaccaggt | aggttcagaa  | caattgcatg | tggcctcttc  |
| BAV BA02-C | acaatgaagg | cagaggaaat | aacaccaggt | aggttcagaa  | cgattgcatg | tggcctcttc  |
| BAV BA17-S | acaatgaagg | cagaggaaat | aacaccaggt | aggttcagaa  | cgattgcatg | tggcctcttc  |
| BAV BA11-A | acaatgaagg | cagaggaaat | aacaccaggt | aggttcagaa  | cgattgcatg | tggcctcttc  |
| BAV BA02-C | acaatgaagg | cagaggaaat | aacaccaggt | aggttcagaa  | cgattgcatg | tggcctcttc  |
| BAV BA02-C | acaatgaagg | cagaggaaat | aacaccaggt | aggttcagaa  | cgattgcatg | tggcctcttc  |
| BAV BA02-C | acaatgaagg | cagaggaaat | aacaccaggt | aggttcagaa  | cgattgcatg | tggcctcttc  |
| BAV Hu3969 | acaatgaagg | cagaggaaat | aacaccaggt | aggttcagaa  | cgattgcatg | tggcctcttc  |
| ANDV CHI-9 | actatgaagg | ctgaagaaat | cacgccagga | cgatttagga  | caattgcttg | tggccttttt  |
| ANDV AREB1 | actatgaagg | ctgaagaaat | cacgccagga | cgtttttagga | caattgcttg | tggcctcttc  |
| ANDV Epuye | actatgaagg | ctgaagaaat | cacgccagga | cgtttttagga | caattgcttg | tggcctcttc  |
| ANDV Epili | actatgaagg | ctgaagaaat | cacaccagga | cgtttttagga | caattgcttg | tggcctcttc  |
| ANDV NRC-2 | actatgaagg | ctgaagaaat | cacgccagga | cgatttagga  | caattgcttg | tggccttttc  |
| ANDV NRC-4 | actatgaagg | ctgaagaaat | cacaccagga | cggttttagga | caattgcttg | tggcctcttt  |
| ANDV NRC-6 | actatgaagg | ctgaagaaat | cacgccagga | cgtttttagga | caattgcttg | cggcctcttc  |

|           |           |           |           |           |           |           |
|-----------|-----------|-----------|-----------|-----------|-----------|-----------|
| .... .... | .... .... | .... .... | .... .... | .... .... | .... .... | .... .... |
| 665       | 675       | 685       | 695       | 705       | 715       |           |

|            |            |            |            |            |            |             |
|------------|------------|------------|------------|------------|------------|-------------|
| SNV NM H10 | ccagcccaag | tcaaagcaag | gaatattatc | agtcctgtca | tgggtgtgat | tggcttttagt |
| RIOMV HTN- | cctgctcaaa | tcaaagctcg | gaacattata | agtcacgtca | tgggtgtcat | tggcttttgg  |
| LANV 510B  | cctgctcaaa | tcaaagctcg | gaacattata | agtcacgtca | tgggtgtcat | tggcttttgg  |
| CHOV 588   | ccagctcaag | tcaaagccag | gaatataatt | agcccagtaa | tgggtgtcat | cggtttttgg  |
| JABV AKM96 | cctgcacagg | taaaggcaag | aatataata  | agtcctgtca | tgggggtaat | cggattttgg  |
| MAPV HV-97 | cctgcacagg | tgaaggcaag | gaatataatc | agtcctgtga | tgggtgtcat | tgggttttag  |
| JUQV oln19 | ccagcccaag | tgaagcaag  | gaatattata | agtcctgtca | tgggtgtcat | tggattcagc  |
| JUQV LH    | ccagcccaag | tgaaggcaag | gaatatcata | agtcctgtaa | tgggagtcac | tggattcagc  |
| PERV 14403 | cctgcacaag | ttaaggccag | gaatataatt | agtcacgtca | tgggggtaat | tggtttcagc  |
| MACV 13796 | cctgctcaag | tgaagcccag | gaatatcata | agcccagtga | tgggggtcat | tggtttttag  |
| ORNV O1229 | cctgcacaag | tgaaggccag | gaacatcatc | agtcacgtca | tgggagtaat | cgggttttag  |
| ORNV AND N | cctgcacaag | tgaaggccag | gaacatcatc | agcccagtca | tgggagtaat | cgggttttag  |
| LECV BMJ-N | cctgcacaag | tcaaagcaag | gagcattatc | agtcctgtca | tgggagtcac | cggatttttag |
| LECV BMJ-O | cctgcacaag | ttaaggcaag | aaacatcatt | agtcctgtca | tgggagttat | tggatttttag |
| LECV Plata | cctgcacaag | tgaaggcaag | gaacatcatt | agtcctgtca | tgggggtcat | tgggttcaag  |

|            |            |            |            |             |            |            |
|------------|------------|------------|------------|-------------|------------|------------|
| LECV CO22- | cctgcacaag | tcaaagctag | gaacatcatt | agtctctgtca | tgggggtcat | tggattcagc |
| LECV BA18- | cctgcacaag | tcaaagctag | aaacatcatt | agtctctgtca | tgggggtcat | tggattcagc |
| LECV BA18- | cctgcacaag | tcaaagctag | aaacatcatt | agtctctgtca | tgggggtcat | tggattcagc |
| LECV ER19- | cctgcacaag | ttaaagctag | aaacatcatt | agtctctgtca | tgggggtcat | tggattcagc |
| LECV 22819 | cctgcacaag | tcaaagctag | aaacatcatt | agtctctgtca | tgggggtcat | tggattcagc |
| BAV BA10-A | cctgcacaag | tgaaggctag | aaacatcatt | agccctgtga  | tgggggtaat | tgggttcagc |
| BAV BA16-L | cctgcacaag | tgaaagctag | aaacatcatt | agccctgtga  | tgggggtaat | tgggtttagc |
| BAV BA02-C | cctgcacaag | tgaaagctag | aaacatcatt | agccctgtga  | tgggggtaat | tgggtttagc |
| BAV BA17-S | cctgcacaag | tgaaagctag | aaacatcatt | agccctgtga  | tgggggtaat | tgggtttagc |
| BAV BA11-A | cctgcacaag | tgaaagctag | aaacatcatt | agccctgtga  | tgggggtaat | tgggtttagc |
| BAV BA02-C | cctgcacaag | tgaaagctag | aaacatcatt | agccctgtga  | tgggggtaat | tgggtttagc |
| BAV BA02-C | cctgcacaag | tgaaagctag | aaacatcatt | agccctgtga  | tgggggtaat | tgggtttagc |
| BAV BA02-C | cctgcacaag | tgaaagctag | aaacatcatt | agccctgtga  | tgggggtaat | tgggtttagc |
| BAV Hu3969 | cctgcacaag | tgaaagctag | gaacatcatt | agtctctgtga | tgggggtaat | tgggtttagc |
| ANDV CHI-9 | ccagcacagg | tcaaagccc  | aaatataata | agtctctgtaa | tgggagtaat | tggatttggc |
| ANDV AREB1 | ccagcacagg | tcaaagctcg | aaacataata | agccctgtaa  | tgggagtgat | tggatttggc |
| ANDV Epuye | ccagcacagg | tcaaagctcg | aaacataata | agccctgtaa  | tgggagtgat | tggatttggc |
| ANDV Epili | ccagcacagg | tcaaagctcg | aaacataata | agccctgtaa  | tgggagtgat | tggatttggc |
| ANDV NRC-2 | ccagcacagg | ttaaagctcg | aaatataata | agtctctgtga | tgggagtaat | tggatttggc |
| ANDV NRC-4 | ccagcacagg | tcaaagctcg | aaatataata | agtctctgtga | tgggagtaat | tggatttggc |
| ANDV NRC-6 | ccagcacagg | tcaaagctcg | aaacataata | agccctgtaa  | tgggagtgat | tggatttggc |

|           |           |           |           |           |           |
|-----------|-----------|-----------|-----------|-----------|-----------|
| .... .... | .... .... | .... .... | .... .... | .... .... | .... .... |
| 725       | 735       | 745       | 755       | 765       | 775       |

|            |             |            |             |            |            |            |
|------------|-------------|------------|-------------|------------|------------|------------|
| SNV NM H10 | ttttttgtga  | aagattggat | ggaaaggatt  | gatgacttcc | tggctgcacg | ttgcccattt |
| RIOMV HTN- | cacttttgtga | aggactggat | ggaaaggatt  | gacaactttc | taggagaaga | ttgcccattt |
| LANV 510B  | cacttttgtga | aggactggat | ggaaaggatt  | gacaactttc | taggagaaga | ttgcccattt |
| CHOV 588   | ttttttgttaa | aggattggat | ggatcgtatt  | gataattttc | tatctgctga | gtgtccattt |
| JABV AKM96 | ttttttgtta  | aggattggat | ggatcggata  | gaagactttt | tggctgcaga | gtgcccattt |
| MAPV HV-97 | ttcttttgtga | aggactggat | ggataggatt  | gaagaattcc | ttggtgcaga | atgtccattc |
| JUQV oIn19 | ttttttgtca  | aagattggat | ggaaaggatt  | gaaaattttc | tagctgctga | atgcccattt |
| JUQV LH    | ttcttttgtaa | aggactggat | ggaaagaatt  | gaaaacttcc | tggctgctga | atgcccgttt |
| PERV 14403 | ttcttctgtca | aggactggat | ggaaagaatt  | gaagattttc | tagctgcaga | gtgtccgttt |
| MACV 13796 | ttcttttgtga | aggattggat | ggaaacggata | gagggattct | tggcagcgga | atgcccattc |
| ORNV O1229 | ttcttttgtga | aggattggat | ggaaaggatt  | gaggattttc | tggcagctga | atgcccattc |
| ORNV AND N | ttcttttgtga | aggattggat | ggaaaggatt  | gaggattttc | tggcagctga | atgcccattc |
| LECV BMJ-N | ttcttttgtaa | aggactggat | ggaaaggatt  | gaagactttc | tggcagctga | atgcccattc |
| LECV BMJ-O | ttcttttgtaa | aagattggat | ggaaaggata  | gaagactttt | tggcagctga | atgtcctttc |
| LECV Plata | ttcttttgtga | aggactggat | ggaaaggata  | gaagattttc | tggcagctga | atgtcctttc |
| LECV CO22- | ttcttttgtga | aggattggat | ggaaaggata  | gaagattttc | tggcagctga | atgtcctttc |
| LECV BA18- | ttcttttgtga | aggattggat | ggaaaggata  | gaagattttc | tggcagctga | atgtcctttc |
| LECV BA18- | ttcttttgtga | aggattggat | ggaaaggata  | gaggattttc | tggcagctga | atgtcctttc |
| LECV ER19- | ttcttttgtga | aagattggat | ggaaaggata  | gaagattttc | tggcagctga | atgtcctttc |
| LECV 22819 | ttcttttgtga | aggattggat | ggaaaggata  | gaagattttc | tggcagctga | atgtcctttc |
| BAV BA10-A | ttcttttgtta | aagactggat | ggaaaggata  | gaagattttc | tggcagcgga | atgcccattt |
| BAV BA16-L | ttcttttgtta | aagactggat | ggaaaggata  | gaagattttc | tggcagctga | atgcccattt |
| BAV BA02-C | ttcttttgtta | aagactggat | ggaaaggata  | gaagattttc | tggcggctga | atgcccattt |
| BAV BA17-S | ttcttttgtta | aagactggat | ggaaaggata  | gaagattttc | tggcagctga | atgcccattt |
| BAV BA11-A | ttcttttgtta | aagactggat | ggaaaggata  | gaagattttc | tggcagctga | atgcccattt |
| BAV BA02-C | ttcttttgtta | aggactggat | ggaaaggata  | gaagattttc | tggcagctga | atgcccattt |
| BAV BA02-C | ttcttttgtta | aggactggat | ggaaaggata  | gaagattttc | tggcagctga | atgcccattt |
| BAV BA02-C | ttcttttgtta | aggactggat | ggaaaggata  | gaagattttc | tggcagctga | atgcccattt |
| BAV Hu3969 | ttcttttgtta | aagactggat | ggaaaggatt  | gaagattttc | tggcagctga | atgcccattt |
| ANDV CHI-9 | ttcttttgtaa | aggattggat | ggatcggata  | gaagagtttc | tggctgcaga | gtgtccattc |
| ANDV AREB1 | ttcttttgtga | aggactggat | ggatcggata  | gaggaattcc | tggctgcaga | gtgtccattc |
| ANDV Epuye | ttcttttgtga | aggactggat | ggatcggata  | gaggaattcc | tggctgcaga | gtgtccattc |
| ANDV Epili | ttcttttgtga | aggactggat | ggatcggata  | gaggaattcc | tggctgcaga | gtgtccattc |
| ANDV NRC-2 | ttttttgttaa | aggactggat | ggatcggata  | gaggaattcc | tggctgcaga | gtgtccattc |
| ANDV NRC-4 | ttcttttgtaa | aggactggat | ggatcggata  | gaggaattcc | tggctgcaga | gtgtccattc |
| ANDV NRC-6 | ttcttttgtga | aggactggat | ggatcggata  | gaggaattcc | tggctgcaga | gtgtccattc |

|           |           |           |           |           |           |
|-----------|-----------|-----------|-----------|-----------|-----------|
| .... .... | .... .... | .... .... | .... .... | .... .... | .... .... |
| 785       | 795       | 805       | 815       | 825       | 835       |

|            |            |           |            |            |             |            |
|------------|------------|-----------|------------|------------|-------------|------------|
| SNV NM H10 | ctgcctgagc | agaagaccc | tagagatgct | gcattggcaa | ctaataagagc | ctattttata |
|------------|------------|-----------|------------|------------|-------------|------------|



|            |            |            |            |            |            |             |
|------------|------------|------------|------------|------------|------------|-------------|
| RIOMV HTN- | cttccaaagg | ctagggttca | atcagaggca | ttcatgtcaa | cgaatagggc | atattttcta  |
| LANV 510B  | cttccaaagg | ctagggttca | atcagaggca | ttcatgtcaa | cgaatagggc | atattttcta  |
| CHOV 588   | ttgcagaagc | caaaagttcc | atctgaggca | tttacaacca | caaatcgggc | atattttctg  |
| JABV AKM96 | ctgccaaaac | caaagaatca | ggcagatgca | ttcatgggga | caaacagagc | ttattttatt  |
| MAPV HV-97 | ctccccaaac | caaaatccca | gtcagagaat | ttcatgtcaa | caaatagggc | ttatctaatt  |
| JUQV oln19 | cttccaaaac | caaaggtcgc | atctgaggca | ttcatggcta | caaacaaggc | atactttcta  |
| JUQV LH    | cttccaaaac | cgaaggttgc | atctgaggca | ttcatggcaa | caaataaggc | atacttttta  |
| PERV 14403 | ctacctaagc | ctaaaaccac | ctctgaggca | ttcatgtcaa | ctaataaggc | ttattttcta  |
| MACV 13796 | ttacctaagc | ccaaaacagc | tgctgagaca | ttcatggcca | ccaataaggc | atactttttt  |
| ORNV 01229 | ttacctaaac | ccaaggcatt | gtctgaagca | ttcatggcta | ctaataaagc | ttattttctg  |
| ORNV AND N | ttacctaaac | ccaaggcatt | gtctgaagca | ttcatggcta | ctaataaagc | ttattttctg  |
| LECV BMJ-N | ctgccgaagc | caaaggctcc | atctgaagca | ttcatggcca | ctaacaaggc | ctatttttta  |
| LECV BMJ-O | ctaccaaagc | caaaggctcc | atctgaagca | ttcatggcca | ctaacaagc  | ctatttttta  |
| LECV Plata | ttacccaaac | ctaaggctcc | atctgaagcg | ttcatggcca | ccaataaagc | ctattttotta |
| LECV CO22- | ttacccaaac | caaaggcacc | atctgaagca | ttcatggcca | ccaataaagc | ctactttctg  |
| LECV BA18- | ttacccaaac | caaaggcacc | atctgaagca | ttcatggcca | ccaataaagc | ctactttctg  |
| LECV BA18- | ttacccaaac | caaaggcacc | atctgaagca | ttcatggcca | ccaataaagc | ctactttctg  |
| LECV ER19- | ttacccaaac | caaaggcacc | atctgaagca | ttcatggcca | ccaataaagc | ctactttctg  |
| LECV 22819 | ttacccaaac | caaaggcacc | atctgaagca | ttcatggcca | ccaataaagc | ctactttctg  |
| BAV BA10-A | ttgcccaagc | ctaaagctcc | atctgaggca | tttatggcta | ccaacaaagc | atattttctg  |
| BAV BA16-L | ttgcccaagc | ctaaagctcc | atctgaggca | tttatggcta | ccaacaaagc | gtattttctg  |
| BAV BA02-C | ttgcccaagc | ctaaagctcc | atctgaggca | tttatggcta | ccaacaaagc | gtattttctg  |
| BAV BA17-S | ttgcccaagc | ctaaagctcc | atctgaggca | tttatggcta | ccaacaaagc | gtattttctg  |
| BAV BA11-A | ttgcccaagc | ctaaagctcc | atctgaggca | tttatggcta | ccaacaaagc | gtattttctg  |
| BAV BA02-C | ttgcccaagc | ctaaagctcc | atctgaggca | tttatggcta | ccaacaaagc | atattttctg  |
| BAV BA02-C | ttgcccaagc | ctaaagctcc | atctgaggca | tttatggcta | ccaacaaagc | atattttctg  |
| BAV BA02-C | ttgcccaagc | ctaaagctcc | atctgaggca | tttatggcta | ccaacaaagc | atattttctg  |
| BAV Hu3969 | ttgcccaagc | ctaaagctcc | atctgaggca | tttatggcta | ccaacaaagc | gtattttctg  |
| ANDV CHI-9 | ttacctaagc | caaaggtcgc | ctcagaagcc | ttcatgtcta | ccaataagat | gtattttctg  |
| ANDV AREB1 | ttgcctaagc | caaaggttgc | ctcagaagcc | ttcatgtcta | ccaacaagat | gtattttctg  |
| ANDV Epuye | ttgcctaagc | caaaggttgc | ctcagaagcc | ttcatgtcta | ccaacaagat | gtattttctg  |
| ANDV Epili | ttgcctaagc | caaaggttgc | ctcagaagcc | ttcatgtcta | ccaacaagat | gtattttctg  |
| ANDV NRC-2 | ttgcctaagc | caaaggttgc | ctcagaagcc | ttcatgtcta | ccaacaagat | gtattttctg  |
| ANDV NRC-4 | ctgcctaagc | caaaggttgc | ctcagaagcc | ttcatgtcta | ccaacaagat | gtattttctg  |
| ANDV NRC-6 | ttgcctaagc | caaaggttgc | ctcagaagcc | ttcatgtcta | ccaacaagat | gtattttctg  |

|           |           |           |           |           |           |
|-----------|-----------|-----------|-----------|-----------|-----------|
| .... .... | .... .... | .... .... | .... .... | .... .... | .... .... |
| 845       | 855       | 865       | 875       | 885       | 895       |

|            |             |            |            |            |            |            |
|------------|-------------|------------|------------|------------|------------|------------|
| SNV NM H10 | acacgtcaat  | tacaggttga | tgagtcaaa  | gtagtgata  | ttgaggacct | gattgctgat |
| RIOMV HTN- | aacaggcaga  | ggcaagtgga | tgagtcgaga | atacaggaca | ttgtggattt | aatacaagca |
| LANV 510B  | aacaggcaga  | ggcaagtgga | tgagtcgaga | atacaggaca | ttgtggattt | aatacaagca |
| CHOV 588   | gcaaggcaaa  | gtcaggtgag | agagtctatt | cttcttgaca | ttgaagacct | aattgatata |
| JABV AKM96 | aacaggcaaa  | accaagttga | ggagtcgaag | atccctgaca | ttgttgacct | aatcgatgag |
| MAPV HV-97 | aacagacaac  | agcaagttcg | ggaatcccag | gtggctgaaa | ttgtggacct | catccagaca |
| JUQV oln19 | aataggcgagc | gtcaagttaa | tgattcaaa  | gtccaagaca | tcgtagacct | tatcgagcat |
| JUQV LH    | aaccggcgagc | gccaagtcaa | tgactcaaa  | gtccaggaca | ttgtggacct | tattgaccat |
| PERV 14403 | aacaggcaga  | gacaggttga | tgaaatctca | gtcccagaca | tagcagaact | gatagaacag |
| MACV 13796 | aacaggcaac  | gccaggttga | tgagtctcaa | gtcccagata | ttgttgaact | tattgaccag |
| ORNV 01229 | aataggcaac  | ggcaggtgaa | tgattcaaaa | gtccaagata | tagttgacct | cattgaccat |
| ORNV AND N | aataggcaac  | ggcaggtgaa | tgattcaaaa | gtccaagata | tagttgacct | cattgaccat |
| LECV BMJ-N | aataggcaac  | ggcaagttaa | tgagtcaaaa | gtccaagata | tagttgatct | cattgaccat |
| LECV BMJ-O | aatagacaaa  | ggcaagtgaa | tgagtcaaaa | gtccaggata | tagttgacct | cattgaccat |
| LECV Plata | aacaggcaaa  | gacaggtcaa | cgagtcaaaa | gtccaggata | tagttgacct | catcgatcat |
| LECV CO22- | aacagacaac  | gacaggttaa | tgagtcaaaa | gttcaagaca | tagttgacct | cattgaccat |
| LECV BA18- | aacagacaac  | gacaggttaa | tgagtcaaaa | gttcaggaca | tagttgacct | cattgatcac |
| LECV BA18- | aacagacaac  | gacaggttaa | tgagtcaaaa | gttcaggaca | tagttgacct | cattgatcac |
| LECV ER19- | aacagacaac  | gacaggttaa | tgagtcaaaa | gttcaggaca | tagttgacct | cattgatcac |
| LECV 22819 | aacagacaac  | gacaggttaa | tgagtcaaaa | gttcaggaaa | tagttgacct | cattgatcac |
| BAV BA10-A | aacaggcaga  | ggcaagtcaa | cgaatctaag | gtccaagata | ttgtggacct | aattgatcat |
| BAV BA16-L | aacaggcaga  | ggcaagtcaa | cgaatctaag | gtccaagata | ttgtggacct | aattgatcat |
| BAV BA02-C | aacaggcaga  | ggcaagtcaa | cgaatctaag | gtccaagata | ttgtggacct | aattgatcat |
| BAV BA17-S | aacaggcaga  | ggcaagtcaa | cgaatctaag | gtccaagata | ttgtggacct | aattgatcat |
| BAV BA11-A | aacaggcaga  | ggcaagtcaa | cgaatctaag | gtccaagata | ttgtggacct | aattgatcat |
| BAV BA02-C | aacaggcaga  | ggcaagtcaa | cgaatctaag | gtccaagata | tcgtggacct | aattgatcat |

|            |             |            |            |            |            |            |
|------------|-------------|------------|------------|------------|------------|------------|
| BAV BA02-C | aacagggcaga | ggcaagtcaa | ogaatctaag | gtccaagata | tcgtggactt | aattgatcat |
| BAV BA02-C | aacagggcaga | ggcaagtcaa | ogaatctaag | gtccaagata | tcgtggactt | aattgatcat |
| BAV Hu3969 | aacagggcaga | ggcaagtcaa | ogaatctaaa | gtccaagata | ttgtagactt | aatcgatcat |
| ANDV CHI-9 | aacagacaga  | gacaagtcaa | tgaatctaag | gttcaagata | ttatcgattt | gatagacat  |
| ANDV AREB1 | aacagacaga  | gacaagtcaa | tgaatctaag | gttcaagaca | ttattgattt | gatagatcat |
| ANDV Epuye | aacagacaga  | gacaagtcaa | tgaatctaag | gttcaagaca | ttattgattt | gatagatcat |
| ANDV Epili | aacagacaga  | gacaagtcaa | tgaatctaag | gttcaagaca | ttattgattt | gatagatcat |
| ANDV NRC-2 | aacagacaaa  | gacaggtcaa | tgaatctaag | gttcaagaca | ttattgattt | aatagatcat |
| ANDV NRC-4 | aacagacaaa  | gacaagtcaa | tgaatctaag | gttcaagaca | tcattgattt | aatagatcat |
| ANDV NRC-6 | aacagggcaga | gacaagtcaa | tgaatctaag | gttcaagaca | ttattgattt | gatagatcat |

|           |           |           |           |           |           |           |
|-----------|-----------|-----------|-----------|-----------|-----------|-----------|
| .... .... | .... .... | .... .... | .... .... | .... .... | .... .... | .... .... |
| 905       | 915       | 925       | 935       | 945       | 955       |           |

|            |             |            |            |            |            |              |
|------------|-------------|------------|------------|------------|------------|--------------|
| SNV NM H10 | gcaagggctg  | agtctgccac | tatattcgca | gatattgcta | ctcctcattc | agtttggggtc  |
| RIOMV HTN- | gcagaggcaa  | gttcagctac | actattcaat | gacattgcaa | caccacattc | tgcattggggtt |
| LANV 510B  | gcagaggcaa  | gttcagctac | actattcaat | gacattgcaa | caccacattc | tgcattggggtt |
| CHOV 588   | gctgagtctg  | aaggtgccac | cctattttaa | gacattgctg | tcctcactc  | tgtgtggggtt  |
| JABV AKM96 | gcagaagcag  | agggggcaac | attgtctcga | gacatagcag | taccacattc | tgcattggatt  |
| MAPV HV-97 | gctgaggcag  | aatctgccac | attattccat | gatattgcca | gccccattc  | tgtctggggtt  |
| JUQV oln19 | gcagagatcg  | agtctgcaac | attgtttact | gacattgcaa | caccacattc | tgtttggggtg  |
| JUQV LH    | gcagaaattg  | aatctgcaac | attgtttact | gacattgcaa | caccacattc | tgtatgggta   |
| PERV 14403 | gcggaatctg  | agtctgcaac | tttattcaca | gaaattgcaa | gcctcattc  | agtatgggta   |
| MACV 13796 | gctgagtctg  | agtctgccac | cctgtttaca | gaaatagcta | gccccattc  | agtgtggggtg  |
| ORNV O1229 | gcagagattg  | aatcagcaac | acttttcaca | gacattgcaa | ctccccattc | agtttgggta   |
| ORNV AND N | gcagagattg  | aatcagcaac | acttttcaca | gacattgcaa | ctcctcattc | agtttgggta   |
| LECV BMJ-N | gcagagaccg  | agtcagcaac | actgttcaca | gatattgcta | ctccacactc | agtgtgggta   |
| LECV BMJ-O | gcgagagactg | agtcagcaac | attgtttacg | gatattgcta | ctccacactc | agtgtggggtg  |
| LECV Plata | gcagagactg  | agtcagcaac | attgttcaca | gatattgcta | ctccacactc | agtgtggggtg  |
| LECV CO22- | gcagagaccg  | agtcagcaac | actgtttaca | gatattgcaa | ctccacactc | agtgtggggtg  |
| LECV BA18- | gcagagactg  | agtcagcaac | actgtttaca | gatattgcaa | ctccacactc | agtgtggggtg  |
| LECV BA18- | gcagagactg  | agtcagcaac | actgtttaca | gatattgcaa | ctccacactc | agtgtgggta   |
| LECV ER19- | gcagagactg  | agtcagcaac | actgtttaca | gatattgcaa | ccccacactc | agtgtggggtg  |
| LECV 22819 | gcagagactg  | agtcagcaac | attgtttaca | gatattgcaa | ctccacactc | agtatggggtg  |
| BAV BA10-A | gcagagactg  | aatcggcaac | actgtttaca | gatattgcca | ccccacactc | agtgtgggta   |
| BAV BA16-L | gcagagactg  | aatcggcaac | actgtttaca | gatattgcca | ccccacactc | agtgtgggta   |
| BAV BA02-C | gcagagactg  | aatcggcaac | cctgtttaca | gatattgcca | ccccacactc | agtgtgggta   |
| BAV BA17-S | gcagagactg  | aatcggcaac | actgtttaca | gatattgcca | ccccacactc | agtgtgggta   |
| BAV BA11-A | gcagagactg  | aatcggcaac | actatttaca | gatattgcca | ccccacactc | agtgtgggta   |
| BAV BA02-C | gcagagactg  | aatcggcaac | actgtttaca | gatattgcca | ccccacactc | agtgtgggta   |
| BAV BA02-C | gcagagactg  | aatcggcaac | actgtttaca | gatattgcca | ccccacactc | agtgtgggta   |
| BAV BA02-C | gcagagactg  | aatcggcaac | actgtttaca | gatattgcca | ccccacactc | agtgtgggta   |
| BAV Hu3969 | gcagagactg  | aatcggcaac | actgtttaca | gatattgcca | ccccacactc | agtgtgggta   |
| ANDV CHI-9 | gctgagaccg  | agtctgctac | cttgtttaca | gagattgcaa | cacccattc  | agtctggggtg  |
| ANDV AREB1 | gctgaaactg  | aatctgccac | cttgtttacg | gaaattgcaa | cacccattc  | agtctggggtg  |
| ANDV Epuye | gctgaaactg  | agtctgctac | cttgtttacg | gaaattgcaa | cacccattc  | agtctggggtg  |
| ANDV Epili | gctgaaactg  | agtctgctac | cttgtttacg | gaaattgcaa | cacccattc  | agtctggggtg  |
| ANDV NRC-2 | gctgaaactg  | agtctgctac | cttgtttaca | gaaattgcaa | cacccattc  | agtctggggtg  |
| ANDV NRC-4 | gctgaaactg  | agtctgctac | cttgtttaca | gaaattgcaa | cacccattc  | agtctggggtg  |
| ANDV NRC-6 | gctgaaactg  | agtctgctac | cttgtttacg | gaaattgcaa | cacccattc  | agtctggggtg  |

|           |           |           |           |           |           |           |
|-----------|-----------|-----------|-----------|-----------|-----------|-----------|
| .... .... | .... .... | .... .... | .... .... | .... .... | .... .... | .... .... |
| 965       | 975       | 985       | 995       | 1005      | 1015      |           |

|            |             |            |             |            |             |             |
|------------|-------------|------------|-------------|------------|-------------|-------------|
| SNV NM H10 | tttgcattgtg | ctccagatcg | ttgtccacct  | acagcattat | atgtggccgg  | gatgccggaa  |
| RIOMV HTN- | tttgcattgtg | ccccagatag | gtgtcctcca  | actgcattat | atgttgccagg | tgtcccagaa  |
| LANV 510B  | tttgcattgtg | ccccagatag | gtgtcctcca  | actgcattat | atgttgccagg | tgtcccagaa  |
| CHOV 588   | tttgcctgtg  | caccagaccg | gtgtccacca  | acagcactat | atattgctgg  | gatgcctgag  |
| JABV AKM96 | tttgcattgcg | caccagatag | gtgtccacca  | actgcattat | atgttgccagg | aatcccagaa  |
| MAPV HV-97 | tttgcattgtg | cacctgatcg | atgtccctcca | actgctttat | atgttgccagg | cgttccctgag |
| JUQV oln19 | tttgcattgtg | cacctgatag | atgtccacca  | acggcattgt | atgttagcagg | agtcccata   |
| JUQV LH    | tttgcattgtg | cacctgatag | atgtccaccg  | acagcattgt | atgttagcagg | agtcccagag  |
| PERV 14403 | tttgcattgtg | caccagatag | atgtcccgct  | acagccctgt | atgttgccagg | agtaccagaa  |
| MACV 13796 | tttgcattgtg | cacctgatag | gtgtccaccg  | acagcattat | atgttgccagg | agtgccagag  |
| ORNV O1229 | ttcgcattgtg | caccagatcg | ctgtccaccg  | acagccttat | atgttgccagg | ggttccctgag |
| ORNV AND N | ttcgcattgtg | caccagatcg | ctgtccaccg  | acagccttat | atgttgccagg | ggttccctgag |

|            |       |       |       |       |       |       |
|------------|-------|-------|-------|-------|-------|-------|
| LECV BMJ-N | tttgc | atgtg | ctgtc | acagc | atgtt | tgttc |
| LECV BMJ-O | tttgc | atgtg | ttgtc | acagc | atgtc | tgttc |
| LECV Plata | tttgc | atgtg | ttgcc | acagc | atgtt | tgttc |
| LECV CO22- | tttgc | atgtg | ttgtc | acagc | atgtt | tgttc |
| LECV BA18- | tttgc | atgtg | ttgtc | acagc | atgtt | tgttc |
| LECV BA18- | tttgc | atgtg | ttgtc | acagc | atgtt | tgttc |
| LECV ER19- | tttgc | atgtg | ttgtc | acagc | atgtt | tgttc |
| LECV 22819 | tttgc | atgtg | ttgcc | acagc | atgtt | tgttc |
| BAV BA10-A | tttgc | atgtg | ttgcc | acagc | atgtt | ggtc  |
| BAV BA16-L | tttgc | atgtg | ttgcc | acaac | atgtt | ggtc  |
| BAV BA02-C | tttgc | atgtg | ttgcc | acagc | atgtt | ggtc  |
| BAV BA17-S | tttgc | atgtg | ttgcc | acagc | atgtt | ggtc  |
| BAV BA11-A | tttgc | atgtg | ttgcc | acagc | atgtt | ggtc  |
| BAV BA02-C | tttgc | atgtg | ttgcc | acagc | atgtt | ggtc  |
| BAV BA02-C | tttgc | atgtg | ttgcc | acagc | atgtt | ggtc  |
| BAV BA02-C | tttgc | atgtg | ttgcc | acagc | atgtt | ggtc  |
| BAV Hu3969 | tttgc | atgtg | ttgcc | acagc | atgtt | ggtc  |
| ANDV CHI-9 | tttgc | atgtg | gtgcc | actgc | atgtt | ggta  |
| ANDV AREB1 | tttgc | atgtg | gtgcc | actgc | atgtt | ggta  |
| ANDV Epuye | tttgc | atgtg | gtgcc | actgc | atgtc | ggta  |
| ANDV Epili | tttgc | atgtg | gtgcc | actgc | atgtt | ggta  |
| ANDV NRC-2 | tttgc | atgtg | gtgcc | actgc | atgtt | ggta  |
| ANDV NRC-4 | tttgc | atgtg | gtgcc | actgc | atgtt | ggta  |
| ANDV NRC-6 | tttgc | atgtg | gtgcc | actgc | atgtt | ggta  |

|            |           |           |           |           |           |           |
|------------|-----------|-----------|-----------|-----------|-----------|-----------|
|            | .... .... | .... .... | .... .... | .... .... | .... .... | .... .... |
|            | 1025      | 1035      | 1045      | 1055      | 1065      | 1075      |
| SNV NM H10 | ctgggtg   | tttttg    | tctccag   | atgagga   | ccataat   | atccaaat  |
| RIOMV HTN- | ctcgggg   | tctttgc   | actccag   | atgagaa   | caatcat   | atctaaat  |
| LANV 510B  | ctcgggg   | tctttgc   | actccag   | atgagaa   | caatcat   | atctaaat  |
| CHOV 588   | cttggag   | tcttcg    | acttca    | atgagaa   | ccatcat   | atcaaaat  |
| JABV AKM96 | ttgggtg   | tcttct    | ccttca    | atgagaa   | ccattat   | atcaaaat  |
| MAPV HV-97 | cttgggg   | tcttct    | cctacag   | atgagaa   | ccatcat   | ctcaaa    |
| JUQV oIn19 | ttgggag   | tctttgc   | actccag   | atgcg     | ccatcat   | ttcaaa    |
| JUQV LH    | ctaggtg   | tttttg    | acttcag   | atgcg     | ccatcat   | ttcaaa    |
| PERV 14403 | cttgggg   | tttttg    | actaca    | atgagga   | caataat   | atcaaa    |
| MACV 13796 | ctaggtg   | tttttg    | actaca    | atgagaa   | ccattat   | atcaaa    |
| ORNV O1229 | ctagggg   | tctttgc   | ccttcag   | atgcg     | caatcat   | atcaaa    |
| ORNV AND N | ctagggg   | tctttgc   | ccttcag   | atgcg     | caatcat   | atcaaa    |
| LECV BMJ-N | ttgggtg   | tttttg    | cctacag   | atgcg     | caatcat   | ctcaaa    |
| LECV BMJ-O | ttgggtg   | tctttgc   | tttgca    | atgcg     | caattat   | ttcaaa    |
| LECV Plata | ttgggtg   | tctttgc   | cctacag   | atgcg     | caatcat   | ttcaaa    |
| LECV CO22- | ctgggtg   | tctttg    | cctacag   | atgagaa   | cgatcat   | atcaaa    |
| LECV BA18- | ctgggtg   | tttttg    | tctacag   | atgcg     | cgatcat   | atcaaa    |
| LECV BA18- | ctgggtg   | tttttg    | tctacag   | atgcg     | cgatcat   | atcaaa    |
| LECV ER19- | ctgggtg   | tttttg    | tctacag   | atgcg     | caatcat   | atcaaa    |
| LECV 22819 | ctgggtg   | tttttg    | tctacag   | atgcg     | caatcat   | atcaaa    |
| BAV BA10-A | ctaggtg   | tctttg    | tttgca    | atgcg     | caatcat   | atcaaa    |
| BAV BA16-L | ctaggtg   | tttttg    | tttgca    | atgcg     | caatcat   | atcaaa    |
| BAV BA02-C | ctaggtg   | tttttg    | tttgca    | atgcg     | caatcat   | atcaaa    |
| BAV BA17-S | ctaggtg   | tttttg    | tttgca    | atgcg     | caatcat   | atcaaa    |
| BAV BA11-A | ctaggtg   | tttttg    | tttgca    | atgcg     | caatcat   | atcaaa    |
| BAV BA02-C | ctaggtg   | tttttg    | tttgca    | atgcg     | caatcat   | atcaaa    |
| BAV BA02-C | ctaggtg   | tttttg    | tttgca    | atgcg     | caatcat   | atcaaa    |
| BAV BA02-C | ctaggtg   | tttttg    | tttgca    | atgcg     | caatcat   | atcaaa    |
| BAV Hu3969 | ctaggtg   | tctttg    | tttgca    | atgcg     | caatcat   | atcaaa    |
| ANDV CHI-9 | cttgggt   | tttttt    | ccttcag   | atg       | ccatcat   | atctaa    |
| ANDV AREB1 | cttgggt   | tcttttc   | tcttcag   | atg       | ccatcat   | atctaa    |
| ANDV Epuye | cttgggt   | tcttttc   | tcttcag   | atg       | ccatcat   | atctaa    |
| ANDV Epili | cttgggt   | tcttttc   | tcttcag   | atg       | ccattat   | atctaa    |
| ANDV NRC-2 | cttgggt   | tttttt    | ccttcag   | atg       | ccatcat   | atccaa    |
| ANDV NRC-4 | cttgggt   | tcttttc   | tcttcag   | atg       | ccatcat   | atccaa    |
| ANDV NRC-6 | cttgggt   | tcttttc   | tcttcag   | atg       | ccatcat   | atctaa    |

|            | .... .... <br>1085 | .... .... <br>1095 | .... .... <br>1105 | .... .... <br>1115 | .... .... <br>1125 | .... .... <br>1135 |
|------------|--------------------|--------------------|--------------------|--------------------|--------------------|--------------------|
| SNV NM H10 | gtggggacat         | ctgaagagaa         | attgaagaag         | aaatcagcat         | tctaccagtc         | atacttaaga         |
| RIOMV HTN- | gttggaacag         | cagaagaaaa         | gttgaagaag         | aaatctgcct         | tctaccagtc         | atatttacgg         |
| LANV 510B  | gttggaacag         | cagaagaaaa         | gttgaagaag         | aaatctgcct         | tctaccagtc         | atatttacgg         |
| CHOV 588   | gtgggaactg         | ctgaggaaaa         | actgaagaag         | aaatctgcat         | tctatcagtc         | atatcttcga         |
| JABV AKM96 | gtcgggacag         | ctgaagaaaa         | acttaagaaa         | aaatctgcat         | tctaccagtc         | ttatttaagg         |
| MAPV HV-97 | gtaggcactt         | ctgaagagaa         | actgaagaaa         | aaatcagcct         | ttaccaatc          | atatctccgc         |
| JUQV oln19 | gttggcactg         | ctgaagaaaa         | gctgaagaag         | aagtctgcat         | tctaccaatc         | ttatctaaga         |
| JUQV LH    | gtcggcactg         | ctgaggagaa         | actcaagaaa         | aagtctgcat         | tctatcaatc         | ttacttgaga         |
| PERV 14403 | gtcgggactg         | cagaagagaa         | gctcaagaag         | aagtctgctt         | tctaccagtc         | atacttgagg         |
| MACV 13796 | gtgggaacag         | ctgaggagaa         | gttaaagaag         | aaatcagcat         | tctatcaatc         | ttatttgaga         |
| ORNV O1229 | gtaggaacag         | ctgaagaaaa         | actcaagaag         | aagtctgcat         | tctaccagtc         | atacctaagg         |
| ORNV AND N | gtaggaacag         | ctgaagaaaa         | actcaagaag         | aagtctgcat         | tctaccagtc         | atacctaagg         |
| LECV BMJ-N | gtagggacag         | ctgaagaaaa         | gctcaagaag         | aagtctgctt         | tctaccagtc         | atacttaaga         |
| LECV BMJ-O | gttgggacag         | ctgaagaaaa         | actcaagaaa         | aaatctgcct         | tctaccagtc         | atacttgaga         |
| LECV Plata | gtaggaacag         | ctgaagaaaa         | attgaaaaag         | aaatctgctt         | tctaccagtc         | atacttaaga         |
| LECV CO22- | gtaggaacag         | ctgaagagaa         | gctgaagaaa         | aaatctgcct         | tctaccagtc         | atacttgaga         |
| LECV BA18- | gtaggaacag         | ctgaagagaa         | gctgaagaaa         | aaatctgcct         | tctaccagtc         | atacttgagg         |
| LECV BA18- | gtaggaacag         | ctgaagagaa         | gctgaagaaa         | aaatctgcct         | tctaccagtc         | atacttgagg         |
| LECV ER19- | gtaggaacag         | ctgaagagaa         | gctgaagaaa         | aaatctgcct         | tctaccagtc         | atacttaagg         |
| LECV 22819 | gtaggaacag         | ctgaagagaa         | gctgaagaaa         | aaatctgcct         | tctaccagtc         | atacttgagg         |
| BAV BA10-A | gtgggaacag         | ctgaagaaaa         | gcttaagaag         | aaatctgcct         | tctaccagtc         | ttacctcagg         |
| BAV BA16-L | gtgggaacag         | ctgaagaaaa         | gcttaagaag         | aaatctgcct         | tctaccagtc         | ttacctcagg         |
| BAV BA02-C | gtgggaacag         | ctgaagaaaa         | gcttaagaag         | aaatctgcct         | tctaccagtc         | ttacctcagg         |
| BAV BA17-S | gtgggaacag         | ccgaagaaaa         | gcttaagaag         | aaatctgcct         | tctaccagtc         | ttacctcagg         |
| BAV BA11-A | gtgggaacag         | ccgaggaaaa         | gcttaagaag         | aaatctgcct         | tctaccagtc         | ttacctcagg         |
| BAV BA02-C | gtgggaacag         | ccgaagaaaa         | gcttaagaag         | aaatctgcct         | tctaccagtc         | ttacctcagg         |
| BAV BA02-C | gtgggaacag         | ccgaagaaaa         | gcttaagaag         | aaatctgcct         | tctaccagtc         | ttacctcagg         |
| BAV BA02-C | gtgggaacag         | ccgaagaaaa         | gcttaagaag         | aaatctgcct         | tctaccagtc         | ttacctcagg         |
| BAV Hu3969 | gtgggaacag         | ctgaagaaaa         | gcttaagaag         | aaatctgcct         | tctaccagtc         | ttacctcagg         |
| ANDV CHI-9 | gtagggactg         | cagaagagaa         | gctaaagaaa         | aaatctgcct         | tctaccaatc         | atacctaaga         |
| ANDV AREB1 | gtagggactg         | cagaagagaa         | gctaaagaag         | aaatctgcct         | tctatcaatc         | ttacctgaga         |
| ANDV Epuye | gtagggactg         | cagaagagaa         | gctaaagaag         | aaatctgcct         | tctatcaatc         | ttacctgaga         |
| ANDV Epili | gtagggactg         | cagaagagaa         | gctaaagaag         | aaatctgcct         | tctatcaatc         | ttacctgaga         |
| ANDV NRC-2 | gtggggactg         | cagaagagaa         | gctgaagaag         | aaatctgcct         | tctatcaatc         | ttaccttaaga        |
| ANDV NRC-4 | gtggggactg         | cagaagagaa         | gctgaagaag         | aaatcgcctt         | tctatcaatc         | ttaccttaaga        |
| ANDV NRC-6 | gtagggactg         | cagaagagaa         | gctaaagaag         | aaatctgcct         | tctatcaatc         | ttacctgaga         |

|            | .... .... <br>1145 | .... .... <br>1155 | .... .... <br>1165 | .... .... <br>1175 | .... .... <br>1185 | .... .... <br>1195 |
|------------|--------------------|--------------------|--------------------|--------------------|--------------------|--------------------|
| SNV NM H10 | cgtactcagt         | caatgggaat         | tcaactggac         | cagaagataa         | tcactttata         | catgagccat         |
| RIOMV HTN- | agaactcaat         | caatggggat         | acagttagac         | caaaaaatca         | tcatacttta         | catgttgtct         |
| LANV 510B  | agaactcaat         | caatggggat         | acagttagac         | caaaaaatca         | tcatacttta         | catgttgtct         |
| CHOV 588   | aggacacagt         | ctatggggat         | tcaacttagac        | caaaggataa         | tcactctcta         | catgctccat         |
| JABV AKM96 | cgaacacagt         | caatgggaat         | acaactggat         | caaaagataa         | ttataatgta         | tatgcttcat         |
| MAPV HV-97 | agaacacaat         | caatgggaat         | ccagctcgac         | cagaagatca         | tcactcatgta        | catgctgcac         |
| JUQV oln19 | agaactcaat         | ctatggggat         | acaactggat         | caaaaaatta         | taattatgta         | catgctattc         |
| JUQV LH    | agaactcaat         | ctatggggat         | acaactggat         | cagaagatta         | taattatgta         | tatgttattc         |
| PERV 14403 | agaaccagt          | caatggggat         | tcagttggat         | cagaagatta         | taatcctcta         | tatgttgtca         |
| MACV 13796 | cgaacacagt         | caatggggat         | tcaactggac         | cagaagatca         | tcactctgta         | tatgttgtct         |
| ORNV O1229 | cggacacaat         | ctatgggaat         | ccaactggac         | caaaagatca         | taatccttta         | catgctatcc         |
| ORNV AND N | cggacacaat         | ctatgggaat         | ccaactggac         | caaaagatca         | taatccttta         | catgctatcc         |
| LECV BMJ-N | aggacacagt         | ccatggggat         | tcaactggac         | caaaagatca         | tcactctcta         | catgttgtct         |
| LECV BMJ-O | aggacacaat         | ctatggggat         | tcaactggac         | cagaagatca         | taattctcta         | catgctatca         |
| LECV Plata | aggacgcaat         | ctatggggat         | tcaactggac         | caaaaaatca         | taatccttta         | catgctatca         |
| LECV CO22- | aggacacaat         | ctatgggaat         | tcaactggat         | caaaagatca         | tcactctcta         | tatgctatca         |
| LECV BA18- | aggacacaat         | ctatgggaat         | tcaactggat         | caaaagatca         | taatcctcta         | tatgctatca         |
| LECV BA18- | aggacacaat         | ctatgggaat         | tcaactggat         | caaaagatca         | taatcctcta         | tatgctatca         |
| LECV ER19- | aggacacaat         | ctatgggaat         | tcaactggat         | caaaagatca         | taatcctcta         | tatgctatca         |
| LECV 22819 | aggacacaat         | ctatgggaat         | tcagctggat         | caaaagatca         | taatcctcta         | tatgctatca         |
| BAV BA10-A | agaacgcaat         | caatgggaat         | tcaactggat         | cagaagatca         | taatcctcta         | catgctotca         |
| BAV BA16-L | agaacgcaat         | caatgggaat         | ccaactggat         | cagaagatca         | taactctcta         | catgctotca         |
| BAV BA02-C | agaacgcaat         | caatgggaat         | ccaactggat         | cagaagatca         | taatcctcta         | catgctotca         |

|            |            |            |            |            |            |            |
|------------|------------|------------|------------|------------|------------|------------|
| BAV BA17-S | agaacgcaat | caatgggaat | ccaactggat | cagaagatca | taatcctcta | catgctctca |
| BAV BA11-A | agaacgcaat | caatgggaat | ccaactggat | cagaagatca | taatcctcta | catgctctca |
| BAV BA02-C | agaacgcaat | caatgggaat | ccaattggat | cagaaaatca | taatcctcta | catgctctca |
| BAV BA02-C | agaacgcaat | caatgggaat | ccaactggat | cagaaaatca | taatcctcta | catgctctca |
| BAV BA02-C | agaacgcaat | caatgggaat | ccaactggat | cagaagatca | taatcctcta | catgctctca |
| BAV Hu3969 | agaacgcaat | caatgggaat | tcaactggat | caaagatca  | taatcctcta | catgctctca |
| ANDV CHI-9 | aggacacaa  | ctatgggaat | ccaactggac | cagaagatca | taatccttta | catgctatca |
| ANDV AREB1 | aggacacaa  | ctatggggat | tcaactggac | caaagatca  | taatcctcta | catgctctca |
| ANDV Epuye | agaacacaa  | ctatggggat | tcaactggac | caaagatca  | taatcctcta | catgctttca |
| ANDV Epili | aggacacaa  | ctatggggat | tcaactggac | caaagatca  | taatcctcta | catgctctca |
| ANDV NRC-2 | aggacacaa  | ctatgggaat | tcaactggac | cagaaaatca | taattctcta | catgctttca |
| ANDV NRC-4 | aggacacaa  | ctatggggat | tcaactggac | cagaagatca | taattcttta | catgctttca |
| ANDV NRC-6 | aggacacaa  | ctatggggat | tcaactggac | caaagatca  | taatcctcta | catgctctca |

|           |           |           |           |           |           |           |
|-----------|-----------|-----------|-----------|-----------|-----------|-----------|
| .... .... | .... .... | .... .... | .... .... | .... .... | .... .... | .... .... |
| 1205      | 1215      | 1225      | 1235      | 1245      | 1255      |           |

|            |            |            |            |             |            |            |
|------------|------------|------------|------------|-------------|------------|------------|
| SNV NM H10 | tggggaagag | aggccgtgaa | tcacttccat | cttggagatg  | atatggatcc | tgagcttagg |
| RIOMV HTN- | tggggaaag  | aggcagtaa  | tcacttccac | cttgggtgatg | acatggatcc | tgagcttaga |
| LANV 510B  | tggggaaag  | aggcagtaa  | tcacttccac | cttgggtgatg | acatggatcc | tgagcttaga |
| CHOV 588   | tggggaaaag | aagcagtaa  | ccactttcac | cttgggtgatg | acatggatcc | tgagctaagg |
| JABV AKM96 | tggggaaag  | aagctgtcaa | ccatttccac | cttggagatg  | acatggatcc | tgaattgagg |
| MAPV HV-97 | tggggaaag  | aggctgtgaa | tcatttccat | ctaggggatg  | atatggatcc | agagctgagg |
| JUQV oIn19 | tggggtaag  | aagcagtaa  | tcatttccat | ttgggagatg  | atatggacc  | agaactcagg |
| JUQV LH    | tggggcaaag | aggcagtaa  | ccacttccat | ctgggagatg  | atatggacc  | agaactcagg |
| PERV 14403 | tggggaaag  | aggctgtcaa | tcatttccat | cttgggtgatg | atatggatcc | tgagctcaga |
| MACV 13796 | tggggtaag  | aggctgtgaa | ccatttccat | cttgggtgatg | atatggatcc | tgaattgaga |
| ORNV O1229 | tggggcaagg | aagcagtgaa | ccatttccat | cttgggtgatg | acatggatcc | tgagctcaga |
| ORNV AND N | tggggcaagg | aagcagtgaa | ccatttccat | cttgggtgatg | atatggatcc | tgagctcaga |
| LECV BMJ-N | tggggaaaag | aagcagtgaa | ccacttccat | cttgggggatg | atatggatcc | tgagcttaga |
| LECV BMJ-O | tgggggaaag | aagcagtgaa | ccactttcat | cttgggtgatg | atatggatcc | tgagctcaga |
| LECV Plata | tggggaaag  | aagcagtaa  | ccacttccat | cttgggtgatg | atatggatcc | tgagcttaga |
| LECV CO22- | tgggggaaag | aggcagtaa  | tcactttcat | ctcgggtgatg | acatggatcc | tgagcttaga |
| LECV BA18- | tgggggaagg | aggcagtaa  | tcactttcat | cttgggtgatg | atatggatcc | tgagcttaga |
| LECV BA18- | tgggggaagg | aggcagtgaa | tcactttcat | cttgggtgatg | atatggatcc | tgagcttaga |
| LECV ER19- | tgggggaagg | aggcagtaa  | tcacttccat | cttgggtgatg | atatggatcc | tgagcttaga |
| LECV 22819 | tgggggaagg | aggcagtaa  | tcactttcat | cttgggtgatg | atatggatcc | tgagcttaga |
| BAV BA10-A | tggggcaagg | aagcagtgaa | ccatttccat | cttggcgatg  | acatggacc  | tgaactgagg |
| BAV BA16-L | tggggcaagg | aagcagtgaa | ccatttccat | cttgggtgacg | acatggacc  | tgaactgagg |
| BAV BA02-C | tggggtaag  | aagcagtgaa | ccatttccat | cttgggtgacg | acatggacc  | tgaactgagg |
| BAV BA17-S | tggggcaagg | aagcagtgaa | ccatttccat | cttgggtgacg | atatggacc  | tgaactgagg |
| BAV BA11-A | tggggcaagg | aagcagtgaa | ccatttccac | cttgggtgacg | acatggacc  | tgaactgagg |
| BAV BA02-C | tggggcaagg | aagcagtgaa | ccatttccat | cttgggtgacg | acatggacc  | tgaactgagg |
| BAV BA02-C | tggggcaagg | aagcagtgaa | ccatttccat | cttgggtgacg | acatggacc  | tgaactgagg |
| BAV BA02-C | tggggcaagg | aagcagtgaa | ccatttccac | cttgggtgacg | acatggacc  | tgaactgagg |
| BAV Hu3969 | tggggcaagg | aagcagtgaa | ccatttccat | cttgggtgatg | acatggacc  | tgaactgagg |
| ANDV CHI-9 | tggggtaag  | aagctgtgaa | tcacttccat | cttgggtgatg | atatggacc  | tgaactcagg |
| ANDV AREB1 | tggggtaag  | aagctgtgaa | tcatttccat | cttgggtgatg | atatggacc  | tgaactaagg |
| ANDV Epuye | tggggtaag  | aagctgtgaa | tcatttccat | cttgggtgatg | atatggacc  | tgaactaagg |
| ANDV Epili | tggggtaag  | aagctgtgaa | tcatttccat | cttgggtgatg | atatggacc  | tgaactaagg |
| ANDV NRC-2 | tggggtaag  | aagctgtgaa | tcatttccat | cttgggtgatg | atatggacc  | tgaactgagg |
| ANDV NRC-4 | tggggtaag  | aagctgtgaa | tcatttccat | cttgggtgatg | atatggacc  | tgaactaagg |
| ANDV NRC-6 | tggggtaag  | aagctgtgaa | tcatttccat | cttgggtgatg | atatggacc  | tgaattaagg |

|           |           |           |           |           |           |           |
|-----------|-----------|-----------|-----------|-----------|-----------|-----------|
| .... .... | .... .... | .... .... | .... .... | .... .... | .... .... | .... .... |
| 1265      | 1275      | 1285      | 1295      | 1305      | 1315      |           |

|            |             |            |            |            |             |            |
|------------|-------------|------------|------------|------------|-------------|------------|
| SNV NM H10 | gaacttgccc  | agacccttgt | agatatcaag | gtcagggaaa | tctctaacca  | agaaccactt |
| RIOMV HTN- | cagctggcac  | agactctcat | tgatgcaaag | gtcaaagaga | tctctaataca | ggaacccta  |
| LANV 510B  | cagctggcac  | agactctcat | tgatgcaaag | gtcaaagaga | tctctaataca | ggaacccta  |
| CHOV 588   | cagtttagcac | agtccttagt | tgacactaaa | gtgaaggaga | tttcaaacca  | ggaaccttta |
| JABV AKM96 | cagctagctc  | aatcattaat | tgacagcaag | gttaaggaga | tttctaataca | agatccctta |
| MAPV HV-97 | cagctagcac  | agtcattgat | tgacaccaag | gtaaaagaga | tttccaacca  | agagcctttg |
| JUQV oIn19 | cagcttgctc  | aatctctcat | tgacactaag | gtcaaggaga | tctccaacca  | agagccatta |
| JUQV LH    | cagcttgctc  | aatctcttat | tgacactaag | gtcaaggaga | tttccaacca  | agagccatta |
| PERV 14403 | caactggctc  | aagctttgat | tgacacaaaa | gtaaaggaga | tttctaacca  | agagccattg |

|            |            |            |            |            |            |            |
|------------|------------|------------|------------|------------|------------|------------|
| MACV 13796 | caactagcac | aggctttaat | tgatactaaa | gtgaaggaga | tctcaaacca | ggagcctttg |
| ORNV 01229 | caacttgctc | aatccttgat | tgataccaag | gttaaggaaa | tttcaaacca | agagccatta |
| ORNV AND N | caacttgctc | aatccttgat | tgataccaag | gttaaggaaa | tttcaaacca | agagccatta |
| LECV BMJ-N | cagcttgctc | agtctttgat | tgatactaa  | gtgaaagaga | tttccaatca | agagccacta |
| LECV BMJ-O | cagctcgctc | aatccttgat | tgatactaa  | gtgaaggaga | tttccaatca | agagccatta |
| LECV Plata | cagctagctc | agtctttgat | cgatactaa  | gtgaaggaga | tttctaata  | agagccactg |
| LECV CO22- | cagcttgctc | aatccttgat | tgacactaa  | gtgaaggaga | tttccaatca | ggagccatta |
| LECV BA18- | cagcttgctc | agtccctgat | tgacactaa  | gtgaaggaga | tttctaata  | ggagccatta |
| LECV BA18- | cagcttgctc | agtccctgat | tgacactaa  | gtgaaggaga | tttctaata  | ggagccatta |
| LECV ER19- | cagcttgctc | agtccctaat | tgacaccaag | gtgaaggaga | tttccaatca | ggagccgta  |
| LECV 22819 | cagcttgctc | agtccctgat | tgacactaa  | gtgaaggaga | tttccaatca | ggagccatta |
| BAV BA10-A | cagcttgctc | aatctttgat | tgatactaa  | gtgaaggaga | tttcaaata  | agagccattg |
| BAV BA16-L | cagcttgctc | aatctctgat | tgatactaa  | gtgaaggaaa | tttcaaata  | agagccattg |
| BAV BA02-C | cagcttgctc | aatctctgat | tgatactaa  | gtgaaggaaa | tttcaaata  | agagccattg |
| BAV BA17-S | cagcttgctc | aatctctgat | tgatactaa  | gtgaaggaaa | tttcaaata  | agagccattg |
| BAV BA11-A | cagcttgctc | aatctctgat | tgatactaa  | gtgaaggaaa | tttcaaata  | agagccatta |
| BAV BA02-C | cagcttgctc | aatctctgat | cgatactaa  | gtgaaggaaa | tttcaaata  | agagccactg |
| BAV BA02-C | cagcttgctc | aatctctgat | cgatactaa  | gtgaaggaaa | tttcaaata  | agagccactg |
| BAV BA02-C | cagcttgctc | aatctctgat | cgatactaa  | gtgaaggaaa | tttcaaata  | agagccattg |
| BAV Hu3969 | cagcttgctc | aatctcttat | tgacactaa  | gtgaaagaga | tttcaaata  | agagccattg |
| ANDV CHI-9 | cagctagcac | aatctctgat | cgatactaa  | gtgaaggaga | tctcaaacca | agagccactt |
| ANDV AREB1 | cagctagcac | aatccctgat | tgacaccaag | gtgaaggaga | tctcaaacca | agagccacta |
| ANDV Epuye | cagctagcac | aatccctgat | cgacaccaag | gtgaaggaga | tctcaaacca | agagccacta |
| ANDV Epili | cagctagcac | aatccctgat | tgacaccaag | gtgaaggaga | tctcaaacca | agagccacta |
| ANDV NRC-2 | cagctagctc | aatccctgat | tgacaccaag | gtgaaggaga | tctcaaacca | agagccactt |
| ANDV NRC-4 | cagctagctc | aatccctgat | tgacaccaag | gtgaaggaga | tctcaaacca | agagccactt |
| ANDV NRC-6 | cagctagcac | aatccctgat | tgacaccaag | gtgaaggaga | tctcaaacca | agagccacta |

|             |             |             |             |             |             |
|-------------|-------------|-------------|-------------|-------------|-------------|
| ..... ..... | ..... ..... | ..... ..... | ..... ..... | ..... ..... | ..... ..... |
| 1325        | 1335        | 1345        | 1355        | 1365        | 1375        |

|            |            |            |            |            |             |            |
|------------|------------|------------|------------|------------|-------------|------------|
| SNV NM H10 | aaactttaag | tgggcagtaa | tcaacttata | ttcaggg--- | ----cattat  | tataaccagg |
| RIOMV HTN- | aaactctaag | a-----     | -----      | -----      | ----aggcag  | taggatcaat |
| LANV 510B  | aaactctaag | a-----     | -----      | -----      | ----aggcag  | taggatcaat |
| CHOV 588   | aagctttaaa | tgtgga---  | -----      | -----      | ----tggtta  | aagggctgat |
| JABV AKM96 | aaactgtgag | ctatta---  | ----tgatg  | tctg-----  | ----tgactg  | aaaggatgat |
| MAPV HV-97 | aagttgtgag | tc-----    | -----      | -----      | agactggtag  | taaagattga |
| JUQV oln19 | aaactgtag  | tgct-----  | -----      | -----      | tcaaaacggt  | gggaaggtaa |
| JUQV LH    | aaactgtagg | tgct-----  | -----      | -----      | ctacaattat  | gaaggtg-aa |
| PERV 14403 | aaattgtaag | tg-----    | -----      | -----      | -----gat    | aagggcagta |
| MACV 13796 | aagctgtaag | tgtcaa---  | ----gggtg  | taggg----- | ----tggtgt  | ttagtcttaa |
| ORNV 01229 | aagctgtaag | agcc-a---- | ----taatt  | ataagagcca | tta-tgctat  | gagagcgaaa |
| ORNV AND N | aagctgtaag | agcc-a---- | ----taatt  | ataagagcca | tta-tgctat  | gagagccaaa |
| LECV BMJ-N | aagctgtaag | agccaa---  | ----caact  | agtaaagcca | tcaactgcca  | aagagccaat |
| LECV BMJ-O | aagctgtgag | agttga---  | ----aact   | atcaaagcca | tcaactgcca  | aggagccaat |
| LECV Plata | aagctgtaag | agctca---  | ----caact  | ttcagagcca | tcaactgctat | aagagccaaa |
| LECV CO22- | aagctgtaag | agctga---  | ----aaaat  | ttaagagcca | tcaactgcca  | aagagccaga |
| LECV BA18- | aagctgtaag | agctga---  | ----taaat  | ttaagagcca | tcaactgcca  | gagagccaga |
| LECV BA18- | aagctgtaag | agctga---  | ----taaac  | ttaagagcca | tcaactgcca  | aagagccaga |
| LECV ER19- | aagctgtaag | agctaa---  | ----taaat  | ttaagagcca | tcaactgcca  | aagagccaga |
| LECV 22819 | aagctgtaag | agctag---  | ----taaat  | ttaagagcca | tcaactgcca  | aagagccaga |
| BAV BA10-A | aagttgtaag | agccaa---  | ----caaca  | tgtagg---- | ----tgctac  | agtaactgga |
| BAV BA16-L | aagctgtaag | agccaa---  | ----caaca  | tgtagg---- | ----tgctac  | agtaactgga |
| BAV BA02-C | aagctgtaag | agccaa---  | ----cagca  | tgtagg---- | ----tgctac  | agtaactgga |
| BAV BA17-S | aagctgtaag | agccaa---  | ----caaca  | tgtagg---- | ----tgctac  | agtaactgga |
| BAV BA11-A | aagctgtaag | agccaa---  | ----caaca  | tgtagg---- | ----tgctac  | agtaactgga |
| BAV BA02-C | aagctgtaag | agccaa---  | ----caaca  | tgtagg---- | ----tgctac  | agtaactgga |
| BAV BA02-C | aagctgtaag | agccaa---  | ----caaca  | tgtagg---- | ----tgctac  | agtaactgga |
| BAV BA02-C | aagctgtaag | agccaa---  | ----caaca  | tgtagg---- | ----tgctac  | agtaactgga |
| BAV Hu3969 | aagctgtaag | agccaa---  | ----caaca  | tgtagg---- | ----tgctag  | agtaactgga |
| ANDV CHI-9 | aagttgtag  | tgct-----  | -----      | -----      | -taatgaaat  | catgattgaa |
| ANDV AREB1 | aagttataaa | tact-----  | -----      | -----      | -tgatgaaag  | tatgattgaa |
| ANDV Epuye | aagttgtaaa | tact-----  | -----      | -----      | -taatgaaag  | tatgattgaa |
| ANDV Epili | aagttgtaaa | tact-----  | -----      | -----      | -taatgaaag  | tatgattgaa |
| ANDV NRC-2 | aagttgtaag | tgct-----  | -----      | -----      | -taatgaaag  | gataattgaa |

|            |        |      |           |       |       |            |            |
|------------|--------|------|-----------|-------|-------|------------|------------|
| ANDV NRC-4 | aagttg | aaag | tgct----- | ----- | ----- | -tgatgaaag | gatgattgaa |
| ANDV NRC-6 | aagttg | aaa  | tact----- | ----- | ----- | -taatgaaag | tatgattgaa |

  

|  |           |           |           |           |           |           |           |
|--|-----------|-----------|-----------|-----------|-----------|-----------|-----------|
|  | .... .... | .... .... | .... .... | .... .... | .... .... | .... .... | .... .... |
|  | 1385      | 1395      | 1405      | 1415      | 1425      | 1435      |           |

  

|            |            |            |            |             |            |             |
|------------|------------|------------|------------|-------------|------------|-------------|
| SNV NM H10 | -----      | -----gta   | atgggcacta | atcagggttt  | attgcactag | gggtgggttca |
| RIOMV HTN- | -----      | -----g     | attgtggtat | gtgagggctt  | tccgggct-- | --tgtgcca-  |
| LANV 510B  | -----      | -----g     | attgtggtat | gtgagggctt  | tccgggct-- | --tgtgcca-  |
| CHOV 588   | -----      | -----      | -----      | --gagggctt  | tctgggct-- | --tgtgccaa  |
| JABV AKM96 | -----      | -----      | -----      | --agagggct  | cctggggc-- | --tgtgccat  |
| MAPV HV-97 | -----      | -----      | -----      | ----gggctt  | tccgggct-- | --tgtgccaa  |
| JUQV oln19 | -----      | -----      | -----      | gtgaaggcgt  | tccgggct-- | --tgagccaa  |
| JUQV LH    | -----      | -----      | -----      | gtgaaggcgt  | tccgggct-- | --tgagccaa  |
| PERV 14403 | -----      | -----      | --tgatgctt | ggacgg-ttt  | tccgggct-- | --tgtgccac  |
| MACV 13796 | -----      | -----      | -----t     | gatgggtttt  | caggggct-- | --tgtgccat  |
| ORNV O1229 | atagtttaca | tcttgatggt | tatatcagtc | agacgg-ctt  | tccgggct-- | --tgtgccac  |
| ORNV AND N | atagtttaca | tcttgatggt | tatatcactc | agatgg-ctt  | tccgggct-- | --tgtgccac  |
| LECV BMJ-N | accagtcaag | atctatggat | tatgttagtt | agatggattt  | tctgggct-- | --tgtgccaa  |
| LECV BMJ-O | actagttgat | atctaagaat | caggttggtt | agatggattt  | tctgggct-- | --tgtgccaa  |
| LECV Plata | --tagttaat | atctggagat | gctgttggtt | aggtgggttt  | tccgggct-- | --tgtgccac  |
| LECV CO22- | actagtcaat | atctgaagat | tatgttgatt | gggtggattt  | ccggggct-- | --tgtgccac  |
| LECV BA18- | actagtcaat | atctgaaaat | tatgttagtt | gggtggattt  | tccgggct-- | --tgtgccac  |
| LECV BA18- | actagtcaat | atctgaagat | tatgttggtt | gggtggattt  | tccgggct-- | --tgtgccac  |
| LECV ER19- | actagtcaat | atctgaaggt | tatgttggtt | gggtggagtt  | tccgggct-- | --tgtgccac  |
| LECV 22819 | actagtcaat | atctgaagat | tatgttggtt | gggtggattt  | tccgggct-- | --tgtgccac  |
| BAV BA10-A | -----      | -----      | ----taggtt | gggtgggtctt | tctgggct-- | --tgagccac  |
| BAV BA16-L | -----      | -----      | ----taggtt | ggatgggtctt | tctgggct-- | --tgagccac  |
| BAV BA02-C | -----      | -----      | ----taggtt | ggatgggtctt | tctgggct-- | --tgagccac  |
| BAV BA17-S | -----      | -----      | ----taggtt | ggatgggtctt | tctgggct-- | --tgagccac  |
| BAV BA11-A | -----      | -----      | ----taggtt | ggatgggtctt | tctgggct-- | --tgagccac  |
| BAV BA02-C | -----      | -----      | ----taggtt | ggatgggtctt | tctgggct-- | --tgagccac  |
| BAV BA02-C | -----      | -----      | ----taggtt | ggatgggtctt | tctgggct-- | --tgagccac  |
| BAV BA02-C | -----      | -----      | ----taggtt | ggatgggtctt | tctgggct-- | --tgagccac  |
| BAV Hu3969 | -----      | -----      | ----taggtt | ggatgggtctt | tctgggct-- | --tgagccac  |
| ANDV CHI-9 | -----      | -----      | -----      | -gaaagactt  | tccgggct-- | --tgtgccac  |
| ANDV AREB1 | -----      | -----      | -----      | -gagagactt  | tccgggct-- | --tgtgccac  |
| ANDV Epuye | -----      | -----      | -----      | -gagagactt  | tccgggct-- | --tgtgccac  |
| ANDV Epili | -----      | -----      | -----      | -gagagactt  | tccgggct-- | --tgtgccac  |
| ANDV NRC-2 | -----      | -----      | -----      | -gaaagactt  | tccgggct-- | --tgtgccac  |
| ANDV NRC-4 | -----      | -----      | -----      | -gaaagactt  | tccgggct-- | --tgtgccac  |
| ANDV NRC-6 | -----      | -----      | -----      | -gagagactt  | tccgggct-- | --tgtgccac  |

  

|  |           |           |           |           |           |           |
|--|-----------|-----------|-----------|-----------|-----------|-----------|
|  | .... .... | .... .... | .... .... | .... .... | .... .... | .... .... |
|  | 1445      | 1455      | 1465      | 1475      | 1485      | 1495      |

  

|            |             |            |            |            |            |             |
|------------|-------------|------------|------------|------------|------------|-------------|
| SNV NM H10 | agggcccaatt | atatcacagg | gtatataatc | tatattgttt | agtgttattg | -----       |
| RIOMV HTN- | acattttattc | atctcagggc | -----      | ----tattct | gcactaatca | atgggtggga  |
| LANV 510B  | acattttattc | atctcagggc | -----      | ----tattct | gcactaatca | atgggtggga  |
| CHOV 588   | ata-ttaatc  | atctcagggc | ttt----ac  | actaatcggg | aatgtgacta | ctatcag---  |
| JABV AKM96 | a---ttaatc  | atctcaatct | -----      | ----atctct | gacg-----  | -----       |
| MAPV HV-97 | ttggt-----  | -actcagggg | ct-----    | ----actgtc | taattaattg | cactgggttc  |
| JUQV oln19 | tcagttattc  | atctcaggat | ct-----    | ----ttcctt | aatgtgacta | ctaagggt-   |
| JUQV LH    | tcagttattc  | atctcaggat | ct-----    | ----ttcctt | aatgtgacta | ctaagggtt-  |
| PERV 14403 | acaattaatc  | atctcagggc | -----      | ----ttt    | actgtgaata | acagggttt-  |
| MACV 13796 | atgtttaatc  | atctcagggg | c-----     | ----tgtct  | actgtgatta | acaggggtg-- |
| ORNV O1229 | atattttaatc | atctcaggaa | -----      | ----ccttt  | aatgtgatta | atacgggt--  |
| ORNV AND N | atattttaatc | atctcaggaa | -----      | ----ccttt  | aatgtgatta | atacgggt--  |
| LECV BMJ-N | ttattttaatc | atctcaggac | -----      | ----tctct  | aatgtgatta | atacgggt--  |
| LECV BMJ-O | tcattttaatc | atctcaggac | -----      | ----tctct  | aatgtgatta | atacgggt--  |
| LECV Plata | atattttaatc | atctcaggat | -----      | ----ccttt  | aatgtgatta | atacgggt--  |
| LECV CO22- | ttattttaatc | atctcaggat | -----      | ----tcttt  | aatgtgatta | atacgggt--  |
| LECV BA18- | ttattttaatc | atctcaggat | -----      | ----tctct  | aatgtgatta | atacgggt--  |
| LECV BA18- | ttattttaatc | atctcaggat | -----      | ----tctct  | aatgtgatta | atacgggt--  |
| LECV ER19- | ttattttaatc | atctcaggat | -----      | ----tcttt  | aatgtgatta | atacgggt--  |
| LECV 22819 | ttattttaatc | atctcaggat | -----      | ----tctct  | aatgtgatta | atacgggt--  |

|            |             |            |         |            |            |            |
|------------|-------------|------------|---------|------------|------------|------------|
| BAV BA10-A | atattttaatc | atctcaggac | -----   | -----cttt  | aatgtgatta | atgcgggc-- |
| BAV BA16-L | atattttaatc | atctcaggac | -----   | -----cttt  | aatgtgatta | atgcgggg-- |
| BAV BA02-C | atattttaatc | atctcaggac | -----   | -----cttt  | aatgtgatta | atgcgggg-- |
| BAV BA17-S | atattttaatc | atctcaggac | -----   | -----cttt  | aatgtgatta | atgcgggg-- |
| BAV BA11-A | atattttaatc | atctcaagac | -----   | -----cttt  | aatgtaatta | atgcgggg-- |
| BAV BA02-C | atattttaatc | atctcaggac | -----   | -----cttt  | aatgtgatta | atgcgggg-- |
| BAV BA02-C | atattttaatc | atctcaggac | -----   | -----cttt  | aatgtgatta | atgcgggg-- |
| BAV BA02-C | atattttaatc | atctcaggac | -----   | -----cttt  | aatgtgatta | atgcgggg-- |
| BAV Hu3969 | atattttaatc | atctcaggac | -----   | -----cttt  | aatgtgatta | atgcgggg-- |
| ANDV CHI-9 | ata-ttaatc  | atctcaggac | ct----- | ----atcctt | aatgtgatta | ataggggt-- |
| ANDV AREB1 | ata-ttaatc  | atctcagaat | ct----- | ----atcctt | aatgtgatta | ataggggt-- |
| ANDV Epuye | ata-ttaatc  | atctcaggat | ct----- | ----atcctt | aatgtgatta | ataggggt-- |
| ANDV Epili | ata-ttaatc  | atctcaggat | ct----- | ----atcctt | aatgtgatta | ataggggt-- |
| ANDV NRC-2 | ata-ttaatc  | atctcaggac | ct----- | ----atcctt | aatgtgatta | ataggggt-- |
| ANDV NRC-4 | ata-ttaatc  | atctcaggac | ct----- | ----atcctt | aatgtgatta | ataggggt-- |
| ANDV NRC-6 | ata-ttaatc  | atctcaggat | ct----- | ----atcctt | aatgtgatta | ataggggt-- |

|           |           |           |           |           |           |
|-----------|-----------|-----------|-----------|-----------|-----------|
| .... .... | .... .... | .... .... | .... .... | .... .... | .... .... |
| 1505      | 1515      | 1525      | 1535      | 1545      | 1555      |

|            |            |            |             |            |            |             |
|------------|------------|------------|-------------|------------|------------|-------------|
| SNV NM H10 | -tag----ta | ttgtattatg | tattgttagt  | taagcttatt | aaatcttggt | aagtttggtta |
| RIOMV HTN- | ttagtatcta | tgaatgtatg | ggtggtggg   | -----      | -----aatgt | catactactg  |
| LANV 510B  | ttagtatcta | tgaatgtatg | ggtggtggg   | -----      | -----aatgt | catactactg  |
| CHOV 588   | -----      | ttacaatgtg | atgggtgggc  | aa-----    | ----tgggtt | tattgcacta  |
| JABV AKM96 | -----      | -----      | -----       | -----      | -----      | --ggtcatgt  |
| MAPV HV-97 | -----ct    | ttataatgtg | atgggtgg--  | -----      | ----gggtg  | gtgattacta  |
| JUQV oIn19 | -----      | ttattataag | ggtggttagat | ta-----    | ----gggtg  | tttactatta  |
| JUQV LH    | -----      | ttattataag | ggtggttagat | ta-----    | ----gggtg  | tttactatta  |
| PERV 14403 | -----a     | ttattataag | ggtggtgt--  | -----      | ----tgggt  | cttattacta  |
| MACV 13796 | -----      | atattataag | ggtgggaagt  | -----      | ----gggtt  | t--actacta  |
| ORNV O1229 | -----      | ttactatata | aggggtgg--  | -----      | ----tgggt  | tcaattacta  |
| ORNV AND N | -----      | ttactatata | aggggtgg--  | -----      | ----tgggt  | tcaattacta  |
| LECV BMJ-N | -----      | tgattatgag | ggtggtgagt  | -----      | ----gggtt  | tcaattacta  |
| LECV BMJ-O | -----      | tgatcatgag | ggtggttaagt | -----      | ----gggtt  | tcatttacta  |
| LECV Plata | -----      | tgattataag | ggtggttaagt | -----      | ----gggtt  | tcaattacta  |
| LECV CO22- | -----      | tgatcataag | ggtggttaagt | -----      | ----gggtt  | tcaattacta  |
| LECV BA18- | -----      | tgattataag | ggtggttaagt | -----      | ----gggtt  | tcatttacta  |
| LECV BA18- | -----      | tgattataag | ggtggttaagt | -----      | ----gggtt  | tcaattacta  |
| LECV ER19- | -----      | tgattataag | ggtggttaagt | -----      | ----gggtt  | tcaattacta  |
| LECV 22819 | -----      | tgatcataag | ggtggttaagt | -----      | ----gggtt  | tcaattacta  |
| BAV BA10-A | -----      | ttattataag | ggtggttaagt | -----      | ----gggtt  | tcaattacta  |
| BAV BA16-L | -----      | ttattataag | ggtggttaagt | -----      | ----gggtt  | tcaattacta  |
| BAV BA02-C | -----      | ttattataag | ggtggttaagt | -----      | ----gggtt  | tcaattacta  |
| BAV BA17-S | -----      | ttattataag | ggtggttaagt | -----      | ----gggtt  | tcaattacta  |
| BAV BA11-A | -----      | ttattataag | ggtggttaagt | -----      | ----gggtt  | tcaattacta  |
| BAV BA02-C | -----      | ttattataag | ggtggttaagt | -----      | ----gggtt  | tcaattacta  |
| BAV BA02-C | -----      | ttattataag | ggtggttaagt | -----      | ----gggtt  | tcaattacta  |
| BAV BA02-C | -----      | ttattataag | ggtggttaagt | -----      | ----gggtt  | tcaattacta  |
| BAV Hu3969 | -----      | ttattataag | ggtggttaagt | -----      | ----gggtt  | tcaattacta  |
| ANDV CHI-9 | -----      | ttattataag | ggcagttaa-  | -----      | ----tgggg  | ttggttacta  |
| ANDV AREB1 | -----      | ttattataag | ggcagttaa-  | -----      | ----gggg   | ttagatacta  |
| ANDV Epuye | -----      | ttattataag | ggcagttaa-  | -----      | ----gggg   | tcagatacta  |
| ANDV Epili | -----      | ttattataag | ggcagttaa-  | -----      | ----gggg   | tcagatacta  |
| ANDV NRC-2 | -----      | ttattatagg | ggtggttaa-  | -----      | ----gggg   | tcagttacta  |
| ANDV NRC-4 | -----      | ttattataag | ggcagttaa-  | -----      | ----gggg   | tcaattacta  |
| ANDV NRC-6 | -----      | ttattataag | ggtggttaa-  | -----      | ----gggg   | tcagatacta  |

|           |           |           |           |           |           |
|-----------|-----------|-----------|-----------|-----------|-----------|
| .... .... | .... .... | .... .... | .... .... | .... .... | .... .... |
| 1565      | 1575      | 1585      | 1595      | 1605      | 1615      |

|            |            |            |            |            |             |            |
|------------|------------|------------|------------|------------|-------------|------------|
| SNV NM H10 | ag-----    | -ttttgttaa | gttgtattaa | gttttgttaa | gtttcggtaa  | gtctgttaaa |
| RIOMV HTN- | atgggaggat | ttactgatac | gggtaaagaa | -----      | -----       | -----      |
| LANV 510B  | atgggaggat | ttactgatac | gggtaaagaa | -----      | -----       | -----      |
| CHOV 588   | at-----    | -----tta   | gggttaaggg | ccataattga | ttttagtagta | ttagataa-- |
| JABV AKM96 | at-----    | -----tac   | gggtatgggg | tggtttctta | cttattgcac  | tagatatata |
| MAPV HV-97 | a-----     | -----      | gggtaaaggg | ccacaatca- | -----       | -----      |



|            |         |          |            |            |            |            |
|------------|---------|----------|------------|------------|------------|------------|
| JUQV oln19 | at----- | -----ccg | ggtttatggg | ccactactg- | -----      | -----      |
| JUQV LH    | at----- | -----ctg | ggtttatggg | ccactactg- | -----      | -----      |
| PERV 14403 | at----- | -----tac | gggtaa---- | --attacta- | ---tttgcac | tattttttaa |
| MACV 13796 | at----- | -----tac | gggt-----  | ----tactg- | tcctttgcac | tactatta-- |
| ORNV O1229 | ac----- | -----tac | gggtaagggg | acattaat-- | --ctttgcac | tagggtta-a |
| ORNV AND N | ac----- | -----tac | gggtaagggg | acattaat-- | --ctttgcac | tagggtta-a |
| LECV BMJ-N | ac----- | -----tac | gggtagggga | acactactg- | tcctttgcac | tagggtta-a |
| LECV BMJ-O | ac----- | -----aat | gggtaagggg | acactacta- | tcttttgcac | tagggtta-a |
| LECV Plata | ac----- | -----tac | gggtagggga | acactacta- | tcctttgcac | tagggtta-a |
| LECV CO22- | ac----- | -----tat | gggtggggga | acactacta- | tcctttgcac | tagggtta-a |
| LECV BA18- | ac----- | -----tgt | gggtatggga | acactacta- | tcctttgcac | tagggtta-a |
| LECV BA18- | ac----- | -----tgt | gggtatggga | acactacta- | tcctttgcac | tagggtta-a |
| LECV ER19- | ac----- | -----tgt | gggtatggga | acactacta- | tcctttgcac | tagggtta-a |
| LECV 22819 | ac----- | -----ttt | gggtatggga | acactacta- | tcctttgcac | tagggtta-a |
| BAV BA10-A | ac----- | -----tac | gggtaaggg- | acactacta- | tcctttgcac | tggggtta-a |
| BAV BA16-L | ac----- | -----tac | gggtaaggg- | acactacta- | tcctttgcac | tggggtta-a |
| BAV BA02-C | ac----- | -----tac | gggtaaggg- | acactacta- | tcctttgcac | tggggtta-a |
| BAV BA17-S | ac----- | -----tac | gggtaaggg- | acactacta- | tcctttgcac | tggggtta-a |
| BAV BA11-A | ac----- | -----tac | gggtaaggg- | acactacta- | tcctttgcac | tggggtta-a |
| BAV BA02-C | ac----- | -----tac | gggtaaggg- | acactacta- | tcctttgcac | tggggtta-a |
| BAV BA02-C | ac----- | -----tac | gggtaaggg- | acactacta- | tcctttgcac | tggggtta-a |
| BAV BA02-C | ac----- | -----tac | gggtaaggg- | acactacta- | tcctttgcac | tggggtta-a |
| BAV Hu3969 | ac----- | -----tac | gggtaaggg- | acactacta- | tcctttgcac | tggggtta-a |
| ANDV CHI-9 | ac----- | -----tat | gggtaaggg  | tcattacca- | -tttttgcac | tagggttaaa |
| ANDV AREB1 | ac----- | -----tac | gggtaaggg  | tcattactat | ccttttgcac | tagggttaaa |
| ANDV Epuye | ac----- | -----tac | gggtaaggg  | tcattactat | ccttttgcac | tagggttaaa |
| ANDV Epili | ac----- | -----tac | gggtaaggg  | tcattactat | ccttttgcac | tagggttaaa |
| ANDV NRC-2 | ac----- | -----tac | gagtaaggg  | tcattactan | ntttttgcac | tagggttaaa |
| ANDV NRC-4 | ac----- | -----tac | gggtagggg  | tcattactan | ttttttgcac | tagggttaaa |
| ANDV NRC-6 | ac----- | -----tac | gggtaaggg  | tcattactat | ccttttgcac | tagggttaaa |

|            |            |             |            |             |            |            |
|------------|------------|-------------|------------|-------------|------------|------------|
|            | .... ....  | .... ....   | .... ....  | .... ....   | .... ....  | .... ....  |
|            | 1625       | 1635        | 1645       | 1655        | 1665       | 1675       |
| SNV NM H10 | tg-----tag | ttaatcttga  | tagtattaag | tcatatgtat  | ggggggtgtt | tagt---gtt |
| RIOMV HTN- | -----tat   | cagggatttg  | tataac---- | -aatcatcgt  | aaaagatatt | tagt--ttat |
| LANV 510B  | -----tat   | cagggatttg  | tataac---- | -aatcatcgt  | aaaagatatt | tagt--ttat |
| CHOV 588   | -----      | gtagattta   | agtgatta-g | ttaagtttaa  | gtaattagtt | aagtttaggt |
| JABV AKM96 | taactgtga- | ttattatttg  | cactagta-c | tgatgaatgt  | aagggtggtt | t----cgat  |
| MAPV HV-97 | acactatcat | ctcatattta  | atcagt---- | -----       | -----      | ---a---gat |
| JUQV oln19 | -----      | ttcttatttg  | cactaa---- | -gggggtgatg | gtggggagtt | att----ac  |
| JUQV LH    | -----      | ttcttatttg  | cactaa---- | -aggggttaag | gtggggagta | att----at  |
| PERV 14403 | taa-----   | -atatatttg  | cactac---- | -----       | ---agatttt | aa-----    |
| MACV 13796 | -----      | aatacatttg  | cactatt--- | -gggggaaatg | gggatataca | tgta---gtc |
| ORNV O1229 | gggtcattat | cttgtagttg  | cactaca--- | -ggggatttg  | gatag-gggt | t-----     |
| ORNV AND N | gggtcattat | ctttagattg  | cactaca--- | -ggggatcgg  | gataggggtt | t-----     |
| LECV BMJ-N | gggccattat | tatatatttg  | cactac---- | -tggggtagg  | gttaggtgtt | a-----     |
| LECV BMJ-O | gggccattat | tctatatattg | cactaa---- | -tggggtaag  | gttaaagtgt | a-----     |
| LECV Plata | gggccattag | tatatatttg  | cactac---- | -taggattag  | gggtaagtgt | a-----     |
| LECV CO22- | gggccattac | tatatatttg  | cactac---- | -tggggttag  | ggtaaatgtc | a-----     |
| LECV BA18- | gggccactat | tatatatttg  | cactac---- | -tgggattag  | ggtaaatgtt | a-----     |
| LECV BA18- | gggccactat | tatatatttg  | cactac---- | -tggggttag  | ggtaaatgtt | a-----     |
| LECV ER19- | gggccactat | tatatatttg  | cactac---- | -tgggattag  | ggtaaatgtt | a-----     |
| LECV 22819 | gggccactat | tatatatttg  | cactac---- | -tgggattag  | ggtaaatgtt | a-----     |
| BAV BA10-A | gggccattat | cttatatattg | cactact--- | -tgggggttgg | gataatgggt | a-----     |
| BAV BA16-L | gggtcattat | cttatatattg | cactact--- | -tgggggttgg | gataatgggt | a-----     |
| BAV BA02-C | gggccattat | cttatatattg | cactact--- | -tgggggttgg | gataatgggt | a-----     |
| BAV BA17-S | gggccattat | cttatatattg | cactact--- | -tgggggttgg | gataatgggt | a-----     |
| BAV BA11-A | gggccattat | cttatatattg | cactact--- | -tgggggttgg | gataatgggt | a-----     |
| BAV BA02-C | gggccattat | cttatatattg | cactact--- | -tgggggttgg | gataatgggt | a-----     |
| BAV BA02-C | gggccattat | cttatatattg | cactact--- | -tgggggttgg | gataatgggt | a-----     |
| BAV BA02-C | gggccattat | cttatatattg | cactact--- | -tgggggttgg | gataatgggt | a-----     |
| BAV Hu3969 | gggccattat | cttatatattg | cactact--- | -taggggttgg | gataatgggt | a-----     |
| ANDV CHI-9 | gggccactac | attgtatttg  | cactaa---- | -ggggaaatgg | gaggtgggtt | agt-----tt |
| ANDV AREB1 | gggccactac | attgtatttg  | cactac---- | -ggggaaatgg | gaggtgggtt | agt-----ct |

|            |            |            |            |            |            |            |
|------------|------------|------------|------------|------------|------------|------------|
| ANDV Epuye | gggccactac | attgtatttg | cactac---- | -gggaaatgg | gaggtggggt | agt-----ct |
| ANDV Epili | gggccactac | attgtatttg | cactac---- | -gggaaatgg | gaggtggggt | agt-----ct |
| ANDV NRC-2 | gggccactac | attgtatttg | cactac---- | -gggaaatgg | gaggtggggt | agc-----tt |
| ANDV NRC-4 | gggccactac | atcgtatttg | cactac---- | -gggaaatgg | gaggtggggt | agt-----ct |
| ANDV NRC-6 | gggccactac | attgtatttg | cactac---- | -gggaaatgg | gaggtggggt | agt-----ct |

|             |             |             |             |             |             |
|-------------|-------------|-------------|-------------|-------------|-------------|
| ..... ..... | ..... ..... | ..... ..... | ..... ..... | ..... ..... | ..... ..... |
| 1685        | 1695        | 1705        | 1715        | 1725        | 1735        |

|            |             |            |            |            |            |             |
|------------|-------------|------------|------------|------------|------------|-------------|
| SNV NM H10 | aagtcattgt  | ttattgt-tt | attgttatct | -----gt    | ttaatgctaa | gtctatatga  |
| RIOMV HTN- | atattataga  | attcatg--- | -----      | -----ag    | ttaattacta | aactggttga  |
| LANV 510B  | atattataga  | attcatg--- | -----      | -----ag    | ttaattacta | aactggttga  |
| CHOV 588   | aattagttga  | ggttaag-tg | atthaggtaa | ----gttaag | ataattaaga | atat--ttag  |
| JABV AKM96 | atatccttagt | -----      | -----      | -----a     | gtaatcataa | gttt-----g  |
| MAPV HV-97 | aagtaattgt  | tgttaag--- | -----      | -----ac    | ataggtgtaa | gttt-----   |
| JUQV oln19 | atattattggt | tactaga-tc | tta--tagat | t-----g    | ataagtttag | gtttaagtag  |
| JUQV LH    | atattactggt | tactata-tt | atatgtagat | t-----g    | ataagtttag | gattaagtag  |
| PERV 14403 | atactttata  | tgttatc-cc | attattgtaa | tccatttaat | caaattaggt | gttt-----   |
| MACV 13796 | agtatgtatt  | caatag-ta  | ttcagtggt  | -----      | atcgttagtt | gttttagttgt |
| ORNV O1229 | acattataat  | ctatagg-tc | aata-----  | ----tatagg | ataggtataa | gtatgtatag  |
| ORNV AND N | acattataat  | ctatagg-tt | aata-----  | ----tatagg | ataggtataa | gtatgtatag  |
| LECV BMJ-N | agtccatag-  | ctttagg-ta | attgataagt | tagttataag | atagatttag | aaaa-----   |
| LECV BMJ-O | agtccttag-  | -tttaga-ta | attgataagt | tagttataag | ataga-ttag | aact-----   |
| LECV Plata | agtttatagt  | ttgtaat-ta | gtcgataaga | tagttataaa | gtagacatag | gaat-----   |
| LECV CO22- | agttcatag-  | tcccaat-ta | gttgataaga | tagtgataag | atagacatag | ggtt-----   |
| LECV BA18- | agtccatagt  | tttcagt-ta | gccgataaga | tagtgataag | atagacatag | gaat-----   |
| LECV BA18- | agtccatagt  | tttcaat-ta | gccgataaga | tagtgataag | atagacatag | gaat-----   |
| LECV ER19- | agttcatagt  | tttcaat-ta | gccgataaga | tagtgataag | atagacatag | gaat-----   |
| LECV 22819 | agtccatag-  | tttcaag-ta | gccgataaga | tagtgataag | atagacatag | gaat-----   |
| BAV BA10-A | gaattatagt  | tcataag-tt | agcattgtaa | tagtcctagg | ttaagtatag | attt-----   |
| BAV BA16-L | gaattatagt  | ttataag-tt | agcattataa | tagtcctagg | ttaagtatag | gttt-----   |
| BAV BA02-C | gaattatagt  | tcataag-tt | agcattataa | tagtcctagg | ttaagtatag | gttt-----   |
| BAV BA17-S | gaattatagt  | tcataag-tt | agcattctaa | tagtcctagg | ttaagtatag | gttt-----   |
| BAV BA11-A | gaattatagt  | tcataag-tt | agcattctaa | tagtcctagg | ttaagtatag | gttt-----   |
| BAV BA02-C | gaattatagt  | tcataaa-tt | agcattataa | tagtcctagg | ttaagtatag | gttt-----   |
| BAV BA02-C | gaattatagt  | tcataaa-tt | agcattataa | tagtcctagg | ttaagtatag | gttt-----   |
| BAV BA02-C | gaattatagt  | tcataaa-tt | agcattataa | tagtcctagg | ttaagtatag | gttt-----   |
| BAV Hu3969 | ggatcatagt  | tcataag-tt | agcattgtga | tagtcctagg | ttaagtatag | attt-----   |
| ANDV CHI-9 | gtatt-tagt  | tgttaagttt | ttta-----  | -----      | -----      | -----taa    |
| ANDV AREB1 | atattgtagt  | tgttaag-tt | tttg-----  | -----      | -----      | -----tac    |
| ANDV Epuye | atattgtagt  | tgttaag-tt | tttg-----  | -----      | -----      | -----tac    |
| ANDV Epili | atattgtagt  | tgttaag-tt | tttg-----  | -----      | -----      | -----tac    |
| ANDV NRC-2 | atattatagt  | tgttaag-tt | tttg-----  | -----      | -----      | -----tat    |
| ANDV NRC-4 | atattatagt  | tgttaag-tt | tttg-----  | -----      | -----      | -----tat    |
| ANDV NRC-6 | atattgtatt  | tgttaag-tt | tttg-----  | -----      | -----      | -----tac    |

|             |             |             |             |             |             |
|-------------|-------------|-------------|-------------|-------------|-------------|
| ..... ..... | ..... ..... | ..... ..... | ..... ..... | ..... ..... | ..... ..... |
| 1745        | 1755        | 1765        | 1775        | 1785        | 1795        |

|            |            |            |            |            |            |            |
|------------|------------|------------|------------|------------|------------|------------|
| SNV NM H10 | t--ttattaa | tcaaa---at | aagatttata | tacatagatt | tattttatat | acatagattt |
| RIOMV HTN- | ttat-----  | -----ga    | tttgatcata | t-----     | -----      | ----ggtgct |
| LANV 510B  | ttat-----  | -----ga    | tttgatcata | t-----     | -----      | ----ggtgct |
| CHOV 588   | ccgtatttac | tcattag-gt | ataagtcata | tatat----- | -----cag   | atgtggtaat |
| JABV AKM96 | ttatagtc   | tcatt--tat | gtagttatg  | tata-----  | -----      | ----tgaat  |
| MAPV HV-97 | tctttgatgt | ttaat----- | ----ctgta  | t-----     | -----      | ----gtaat  |
| JUQV oln19 | ccataattaa | ataggatcac | actggctata | t-----     | -----      | ----aaaat  |
| JUQV LH    | ccataattat | gtagaatcat | actggctata | t-----     | -----      | ----gagat  |
| PERV 14403 | ---taagtaa | gtcat---ta | actagctgta | t-----     | -----      | ----gaaat  |
| MACV 13796 | t--taggtaa | gtagc---ta | actagttgta | t-----     | -----      | ----gaaat  |
| ORNV O1229 | tagtaagtat | ataag---ta | gatggccaaa | t-----     | -----      | ----gaaat  |
| ORNV AND N | tagtaagtat | ataag---ta | gatggccaaa | t-----     | -----      | ----gaaat  |
| LECV BMJ-N | ---tgattaa | gtaga---ta | aatagccaga | t-----     | -----      | ----gaagt  |
| LECV BMJ-O | ---tgattaa | gtgga---ta | aatagccaga | t-----     | -----      | ----gacat  |
| LECV Plata | ---tgattaa | gtagg---ta | aatagccaga | t-----     | -----      | ----gaaat  |
| LECV CO22- | ---tgattaa | gtaga---ta | gatagccaga | t-----     | -----      | ----gaaat  |
| LECV BA18- | ---tgattaa | gtaga---ta | gatagccaga | t-----     | -----      | ----gaaat  |

|            |            |            |            |        |       |           |
|------------|------------|------------|------------|--------|-------|-----------|
| LECV BA18- | ---tgattaa | gtaga---ta | gatagccaga | t----- | ----- | ----gaaat |
| LECV ER19- | ---tgattaa | gtaga---ta | gatagccaaa | t----- | ----- | ----gaaat |
| LECV 22819 | ---tgattaa | gtaga---ta | gatagccaga | t----- | ----- | ----gaaat |
| BAV BA10-A | ---tgattag | gtaag---ta | attagccata | t----- | ----- | ----gaaat |
| BAV BA16-L | ---tgattag | gtaag---ca | attagccata | t----- | ----- | ----gaaat |
| BAV BA02-C | ---tgattag | gtaag---ta | attagccata | t----- | ----- | ----gaaat |
| BAV BA17-S | ---taattag | gtaag---ta | attagccata | t----- | ----- | ----gaaat |
| BAV BA11-A | ---tgattag | gtaag---ta | attagccata | t----- | ----- | ----gaaat |
| BAV BA02-C | ---tgattag | gtaag---ta | attagccata | t----- | ----- | ----gaaat |
| BAV BA02-C | ---tgattag | gtaag---ta | attagccata | t----- | ----- | ----gaaat |
| BAV BA02-C | ---tgattag | gtaag---ta | attagccata | t----- | ----- | ----gaaat |
| BAV Hu3969 | ---tgattag | gtaag---ta | attagccata | t----- | ----- | ----gaaat |
| ANDV CHI-9 | tcatatgtta | atgag---ga | attagctata | t----- | ----- | ----gatat |
| ANDV AREB1 | tcataggttt | ataag---ga | atcagctata | t----- | ----- | ----gagat |
| ANDV Epuye | tcataggttt | ataag---ga | atcagctata | t----- | ----- | ----gagat |
| ANDV Epili | tcataggttt | ataag---ga | atcagctata | t----- | ----- | ----gagat |
| ANDV NRC-2 | tcataggtta | atagg---ga | atcagctata | t----- | ----- | ----gaaat |
| ANDV NRC-4 | tcataggttg | ataag---ga | atcagctata | t----- | ----- | ----gaaat |
| ANDV NRC-6 | tcataggttt | ataag---ga | atcagctata | t----- | ----- | ----gagat |

|            |            |            |            |            |            |            |
|------------|------------|------------|------------|------------|------------|------------|
|            | .... ....  | .... ....  | .... ....  | .... ....  | .... ....  | .... ....  |
|            | 1805       | 1815       | 1825       | 1835       | 1845       | 1855       |
| SNV NM H10 | attttatcaa | ctcattatca | tctctcatca | ttaatcaggg | tt-tataaaa | ttttctcagg |
| RIOMV HTN- | tgctgattga | tcaatgagta | a-acctgtca | tttatcacta | ctgtataatc | attagacatg |
| LANV 510B  | tgctgattga | tcaatgagta | a-acctgtca | tttatcacta | ctgtataatc | attagacatg |
| CHOV 588   | cttaggtagt | ttctatgggc | -----atca  | tagatcattg | ggaaatgata | atcaatgaga |
| JABV AKM96 | cactgatata | taa-----   | -----tta   | ttagttacat | -----      | -----      |
| MAPV HV-97 | ctttagttta | t--gttaagt | -----gtt   | ttgatcataa | ---tgatgca | tattgctgag |
| JUQV oln19 | taattgttga | ttggccggga | -----ttgt  | tgtattct-- | -----gtgta | tgtaggttca |
| JUQV LH    | taattgttga | ttggccagaa | -----ttat  | tatattaa-- | -----gtgta | tgtaggttta |
| PERV 14403 | cagtgattga | ccagctagg- | -----tta   | ttaatta--- | -----      | --taatca-- |
| MACV 13796 | caataatcga | tcaact---- | -----tag   | ttagtca--- | -----ttata | accaattata |
| ORNV O1229 | cattgattga | atggctagag | -----tcaa  | tgta-----  | -----      | --tgatt--- |
| ORNV AND N | cattgattga | atggctagag | -----tcaa  | tttat----- | -----      | --tgatt--- |
| LECV BMJ-N | cgttgattga | ttggctattg | -----ttg   | ttaatcacc- | ----atagga | tttagtt--- |
| LECV BMJ-O | cattgattga | tggctattt  | -----tta   | ttaatcaat- | ----atagga | tttaatc--- |
| LECV Plata | cattgattga | ttggctatca | -----ttg   | ttaatcat-  | -----ag    | gattagt--- |
| LECV CO22- | cattgattga | ttggctatca | -----atg   | ttaatcatt- | ----atagga | tttagtt--- |
| LECV BA18- | cactgattga | ttggctatca | -----atg   | ttaatcatt- | ----atagga | tatagtt--- |
| LECV BA18- | cactgattga | ttggctatca | -----atg   | ttaatcatt- | ----atagga | tatagtt--- |
| LECV ER19- | cactgattga | ttggctatca | -----atg   | ttaatcatt- | ----atagga | tatagtt--- |
| LECV 22819 | cactgattga | ttggctatca | -----atg   | ttaatcatt- | ----gtagga | tatagtt--- |
| BAV BA10-A | caatgattga | ttggcttgca | -----ttta  | ttgataat-- | -----tagca | tttagtt--- |
| BAV BA16-L | caatgattga | ttggcttgca | -----ttta  | ttgataat-- | -----tagca | tttaatt--- |
| BAV BA02-C | caatgattga | ttggcttgca | -----ttta  | ttgataat-- | -----tagca | tttaatt--- |
| BAV BA17-S | caatgattga | ttggcttgca | -----ttta  | tcgataat-- | -----tagca | tttaatt--- |
| BAV BA11-A | caatgattga | ttggcttgta | -----ttta  | tcgataat-- | -----tagca | tttaatt--- |
| BAV BA02-C | caatgattga | ttggcttgca | -----ttta  | ttgataat-- | -----tagca | tttaatt--- |
| BAV BA02-C | caatgattga | ttggcttgca | -----ttta  | ttgataat-- | -----tagca | tttaatt--- |
| BAV BA02-C | caatgattga | ttggcttgca | -----ttta  | ttgataat-- | -----tagca | tttaatt--- |
| BAV Hu3969 | caatgattga | ttggcttgca | -----ttta  | ttgataat-- | -----tagta | tttagtt--- |
| ANDV CHI-9 | cactgattga | ttggcta--- | -----tttt  | taggttaagt | ---aattgta | gttaaata-- |
| ANDV AREB1 | cactgattga | ttggctattt | -----tttt  | taggttaagt | ---gattaca | tttaaata-- |
| ANDV Epuye | cactgattga | ttggctattt | -----tttt  | taggttaagt | ---gattaca | tttaaata-- |
| ANDV Epili | cactgattga | ttggctantt | -----tttt  | taggttaagt | ---gattaca | tttaaata-- |
| ANDV NRC-2 | cactgattga | ttggctattt | -----tttt  | taggttaagt | ---gattgca | tttaaata-- |
| ANDV NRC-4 | cactgattga | ttggctattt | -----tttt  | taggttaagt | ---gattgca | tttaaata-- |
| ANDV NRC-6 | cactgattga | ttggctattt | -----tttt  | taggttaagt | ---gattaca | tttaaata-- |

|            |            |            |            |            |            |            |
|------------|------------|------------|------------|------------|------------|------------|
|            | .... ....  | .... ....  | .... ....  | .... ....  | .... ....  | .... ....  |
|            | 1865       | 1875       | 1885       | 1895       | 1905       | 1915       |
| SNV NM H10 | tctatcccta | tattggaaga | ttgttctatt | aaccgt---- | -----tca   | aactggaact |
| RIOMV HTN- | gt-----    | -----      | -----      | -----aag   | ttttatgtgt | aatcaattta |
| LANV 510B  | gt-----    | -----      | -----      | -----aag   | ttttatgtgt | aatcaattta |

|            |            |         |            |            |            |             |
|------------|------------|---------|------------|------------|------------|-------------|
| CHOV 588   | ctgactgct- | -----ga | tggggtgatt | acctgtgatc | tataaatttt | tgttaataact |
| JABV AKM96 | -----      | -----ga | -----      | -----      | ---agtataa | tgtttattat  |
| MAPV HV-97 | ttg-----   | -----   | -----atc   | aactgt-gta | ttagaaattg | tgttaatcat  |
| JUQV oln19 | t-----     | -----   | -----      | -----a     | tatactggta | agttgactat  |
| JUQV LH    | t-----     | -----   | -----      | -----a     | tatattgata | agtttactgt  |
| PERV 14403 | -----      | -----   | -----      | -----      | -----atta  | tgccagtata  |
| MACV 13796 | tc-----    | -----   | -----      | -----at    | tatgccttta | agtcaagtta  |
| ORNV 01229 | -----      | -----   | -----      | -----      | -----ata   | ggttaagtgt  |
| ORNV AND N | -----      | -----   | -----      | -----      | -----ata   | ggttaagtgt  |
| LECV BMJ-N | -----      | -----   | -----      | -----      | -----tta   | agttaagttt  |
| LECV BMJ-O | -----      | -----   | -----      | -----      | -----tta   | agttaagttt  |
| LECV Plata | -----      | -----   | -----      | -----      | -----tta   | agttaagttt  |
| LECV CO22- | -----      | -----   | -----      | -----      | -----tta   | agttaagttt  |
| LECV BA18- | -----      | -----   | -----      | -----      | -----tta   | agttaagttt  |
| LECV BA18- | -----      | -----   | -----      | -----      | -----tta   | agttaagttt  |
| LECV ER19- | -----      | -----   | -----      | -----      | -----tta   | agttaagttt  |
| LECV 22819 | -----      | -----   | -----      | -----      | -----tta   | agttaagttt  |
| BAV BA10-A | -----      | -----   | -----      | -----      | -----ata   | gattaagttc  |
| BAV BA16-L | -----      | -----   | -----      | -----      | -----gta   | gattaagttt  |
| BAV BA02-C | -----      | -----   | -----      | -----      | -----gta   | gattaagttt  |
| BAV BA17-S | -----      | -----   | -----      | -----      | -----gta   | gattaagttt  |
| BAV BA11-A | -----      | -----   | -----      | -----      | -----gta   | gattaagttt  |
| BAV BA02-C | -----      | -----   | -----      | -----      | -----gta   | gattaagttt  |
| BAV BA02-C | -----      | -----   | -----      | -----      | -----gta   | gattaagttt  |
| BAV BA02-C | -----      | -----   | -----      | -----      | -----gta   | gattaagttt  |
| BAV BA02-C | -----      | -----   | -----      | -----      | -----gta   | gattaagttt  |
| BAV Hu3969 | -----      | -----   | -----      | -----      | -----ata   | gattaagttc  |
| ANDV CHI-9 | -----      | -----   | -----      | -----      | -----gttg  | tgttaag-tt  |
| ANDV AREB1 | -----      | -----   | -----      | -----      | -----gttg  | tgttaagttt  |
| ANDV Epuye | -----      | -----   | -----      | -----      | -----gttg  | tgttaagttt  |
| ANDV Epili | -----      | -----   | -----      | -----      | -----gttg  | tgttaagttt  |
| ANDV NRC-2 | -----      | -----   | -----      | -----      | -----gttg  | ttttaagttt  |
| ANDV NRC-4 | -----      | -----   | -----      | -----      | -----gtta  | ttttaagttt  |
| ANDV NRC-6 | -----      | -----   | -----      | -----      | -----gttg  | tgttaagttt  |

|            |            |            |            |            |            |            |
|------------|------------|------------|------------|------------|------------|------------|
|            | .... ....  | .... ....  | .... ....  | .... ....  | .... ....  | .... ....  |
|            | 1925       | 1935       | 1945       | 1955       | 1965       | 1975       |
| SNV NM H10 | aac-----   | -----actg  | tgactctgta | a----agtcc | agattatatt | cacatctgta |
| RIOMV HTN- | aatttatggt | tgttcaactc | t---atttta | at---cattt | ataactaata | atcaggcata |
| LANV 510B  | aatttatggt | tgttcaactc | t---atttta | at---cattt | ataactaata | atcaggcata |
| CHOV 588   | gac-taatac | taatcattat | tatctcttta | t----aaat  | gatatcaaac | taatgtttta |
| JABV AKM96 | agttaagtaa | gaa-----   | ----atttta | a-----     | -----      | -----      |
| MAPV HV-97 | aat--atcaa | taaccatat- | ----atccta | g--gtttagt | taagtaagtt | actaatt-ta |
| JUQV oln19 | aatcaatgga | taatcatata | tcttgatta  | gt---tttt  | aaggttacta | acaaatcata |
| JUQV LH    | aatcaatgga | taatcatata | tattttatta | gt---tggt  | aaggttacta | acaaatcata |
| PERV 14403 | atcatgtttg | tggt-----  | --taattata | gtaataatcc | tgaatatatt | aacaat-ata |
| MACV 13796 | aat-----   | -----      | -----      | -----cat   | tagatacact | aatacttata |
| ORNV 01229 | tac-tattta | tgt-----   | ---attttta | g----gttt  | aagatctact | aacaattatt |
| ORNV AND N | tac-tattta | tgt-----   | ---actttta | g----gttt  | aagatctact | aacaattatt |
| LECV BMJ-N | aat-cattag | ga-----    | ----ttctta | g----gttt  | aagataaact | aacagttatt |
| LECV BMJ-O | aat-tatcag | ta-----    | ----tcctta | g----gttt  | aagataaact | aacaattatt |
| LECV Plata | gat-cattag | ta-----    | ----ccctta | g----gttt  | aagataaact | aacaattatt |
| LECV CO22- | aat-tattag | ta-----    | ----ttcttc | at---ttttt | aagataaact | aacaattatt |
| LECV BA18- | aat-cattag | ca-----    | ----ttctta | gt---ttttt | aagataaact | aacaattatt |
| LECV BA18- | aat-cattag | ca-----    | ----ttctta | gt---ttttt | aagataaact | aacaattatt |
| LECV ER19- | aat-cattag | ca-----    | ----ttctta | gt---ttttt | aagataaact | aacaattatt |
| LECV 22819 | aat-cattag | ca-----    | ----ttctta | gt---ttttt | aagatgaact | aacaattatt |
| BAV BA10-A | aat-tattaa | tg-----    | ----ttttta | g-----ggt  | aagattaact | aacaatcatt |
| BAV BA16-L | aat-tgttaa | tg-----    | ----ttttta | g-----ggt  | aagattaact | aacaatcatt |
| BAV BA02-C | aat-tgttaa | tg-----    | ----ttttta | g-----ggt  | aagattaact | aacaatcatt |
| BAV BA17-S | aat-tgttaa | tg-----    | ----ttttta | g-----ggt  | aagattaact | aacaatcatt |
| BAV BA11-A | aat-tgttaa | tg-----    | ----ttttta | g-----ggt  | aagattaact | aacaatcatt |
| BAV BA02-C | aat-tgttaa | tg-----    | ----ttttta | g-----ggt  | aagattaact | aacaatcatt |
| BAV BA02-C | aat-tgttaa | tg-----    | ----ttttta | g-----ggt  | aagattaact | aacaatcatt |
| BAV BA02-C | aat-tgttaa | tg-----    | ----ttttta | g-----ggt  | aagattaact | aacaatcatt |

|            |             |         |            |           |            |            |
|------------|-------------|---------|------------|-----------|------------|------------|
| BAV Hu3969 | aat-tggttaa | tg----- | ----ttttta | g-----gtt | aagattaact | aacaatcatt |
| ANDV CHI-9 | agtatgttaa  | gg----- | ----tttata | g-----gtt | aagatttact | aacaatcata |
| ANDV AREB1 | agtatgttaa  | gg----- | ----cctata | g-----gtt | aagatctact | aacaattata |
| ANDV Epuye | agtgtgttaa  | gg----- | ----cctata | g-----gtt | aagatctact | aacaattata |
| ANDV Epili | agtgtgttaa  | gg----- | ----cctata | g-----gtt | aagatctact | aacaattata |
| ANDV NRC-2 | agtatgttaa  | gg----- | ----cctata | g-----gtt | aagatctact | aacaattata |
| ANDV NRC-4 | agtatgttaa  | gg----- | ----cctata | g-----gtt | aagatctact | aacaattata |
| ANDV NRC-6 | agtgtgttaa  | gg----- | ----cctata | g-----gtt | aagatctact | aacaattata |

|             |             |             |             |             |             |
|-------------|-------------|-------------|-------------|-------------|-------------|
| ..... ..... | ..... ..... | ..... ..... | ..... ..... | ..... ..... | ..... ..... |
| 1985        | 1995        | 2005        | 2015        | 2025        | 2035        |

|            |             |          |            |            |            |            |
|------------|-------------|----------|------------|------------|------------|------------|
| SNV NM H10 | -----tatat  | ggatgtaa | ttcgttccgt | taatagtaca | tgacactaat | gcttg----- |
| RIOMV HTN- | -----tt     | agatgtaa | ttcattctca | gctta----- | -----t     | gctttgca-- |
| LANV 510B  | -----tt     | agatgtaa | ttcattctca | gctta----- | -----t     | gctttgca-- |
| CHOV 588   | ttaatccatt  | ggatgtaa | ttcgttctg- | -----      | -----gctat | gcttt----- |
| JABV AKM96 | -----ccttt  | agatgtaa | ttcgttctcc | tgctt----- | -----agctt | gctttgca-- |
| MAPV HV-97 | aaactccaga  | agatgtaa | ttcgttccat | gctt-----  | -----tgct  | gctttgctat |
| JUQV oln19 | ctactcaa    | agatgtac | ttcgttcaat | gccttg---- | -----ctact | gcttc----- |
| JUQV LH    | ctactcaa    | agatgtaa | ttcgttcaat | gccttg---- | -----ctact | gcttc----- |
| PERV 14403 | ttatacca    | agatgtaa | ttcattccat | gctt-----  | -----tgct  | gcttt----- |
| MACV 13796 | tcttatcc    | agatgtaa | ttcattccgt | gctt-----  | -----tgct  | gcttt----- |
| ORNV O1229 | gtatgccact  | agatgtaa | ttcgttcatt | gctt-----  | -----tgct  | gcttt----- |
| ORNV AND N | gtatgccact  | agatgtaa | ttcgttcatt | gctt-----  | -----tgct  | gcttt----- |
| LECV BMJ-N | ataatccatt  | ggatgtaa | ttcattcatt | gctt-----  | -----tgct  | gcttt----- |
| LECV BMJ-O | gtaatccatt  | ggatgtaa | ttcgttcatt | gctt-----  | -----tgct  | gcttt----- |
| LECV Plata | ataatccatt  | ggatgtaa | ttcgttcgtt | gctt-----  | -----tgct  | gcttt----- |
| LECV CO22- | ataactccatt | ggatgtaa | ttcgttcatt | gctt-----  | -----tgct  | gcttt----- |
| LECV BA18- | ataatccatt  | ggatgtaa | ttcgttcact | gctt-----  | -----tgct  | gcttt----- |
| LECV BA18- | ataactccatt | ggatgtaa | ttcgttcatt | gctt-----  | -----tgct  | gcttt----- |
| LECV ER19- | ataatccatt  | ggatgtaa | ttcgttcatt | gctt-----  | -----tgct  | gcttt----- |
| LECV 22819 | ataatccact  | ggatgtaa | ttcgttcatt | gctt-----  | -----tgct  | gcttt----- |
| BAV BA10-A | -tactctatt  | ggatgtaa | ttcgttcatt | gctt-----  | -----tgct  | gc-ta----- |
| BAV BA16-L | -tactctatt  | ggatgtaa | ttcgttcatt | gctt-----  | -----tgct  | gc-tt----- |
| BAV BA02-C | -tactctatt  | ggatgtaa | ttcgttcatt | gctt-----  | -----tgct  | gc-tt----- |
| BAV BA17-S | -tactctatt  | ggatgtaa | ttcgttcatt | gctt-----  | -----tgct  | gc-tt----- |
| BAV BA11-A | -tactctatt  | ggatgtaa | ttcgttcatt | gctt-----  | -----tgct  | gc-tt----- |
| BAV BA02-C | -tactctatt  | ggatgtaa | ttcgttcatt | gctt-----  | -----tgct  | gc-tt----- |
| BAV BA02-C | -tactctatt  | ggatgtaa | ttcgttcatt | gctt-----  | -----tgct  | gc-tt----- |
| BAV BA02-C | -tactctatt  | ggatgtaa | ttcgttcatt | gctt-----  | -----tgct  | gc-tt----- |
| BAV Hu3969 | -tactccatt  | ggatgtaa | ttcgttcatt | gctt-----  | -----tgct  | gc-tt----- |
| ANDV CHI-9 | ttatgtcatt  | agatgtaa | ttcattcctg | gcttg----- | -----cttct | gc-tt----- |
| ANDV AREB1 | ttatgtcatt  | ggatgtaa | ttcgttcctg | gcttg----- | -----cttct | gc-tt----- |
| ANDV Epuye | ttatgtcatt  | ggatgtaa | ttcgttcctg | gcttg----- | -----cttct | gc-tt----- |
| ANDV Epili | ttatgtcatt  | ggatgtaa | ttcattcctg | gcttg----- | -----cttct | gc-tt----- |
| ANDV NRC-2 | ttatgtcatt  | ggatgtaa | ttcgtttttg | gcatg----- | -----cttct | gc-tt----- |
| ANDV NRC-4 | ttatgtcatt  | ggatgtaa | ttcgttcttg | gcttg----- | -----cttct | gc-tt----- |
| ANDV NRC-6 | ttatgtcatt  | ggatgtaa | ttcgttcctg | gcttg----- | -----cttct | gc-tt----- |

|             |             |             |             |             |             |
|-------------|-------------|-------------|-------------|-------------|-------------|
| ..... ..... | ..... ..... | ..... ..... | ..... ..... | ..... ..... | ..... ..... |
| 2045        | 2055        | 2065        | 2075        | 2085        | 2095        |

|            |             |            |            |            |            |            |
|------------|-------------|------------|------------|------------|------------|------------|
| SNV NM H10 | -ctttgctac  | taattgattt | cttcattaca | acaa-tctac | ctcattgt-- | -ccctatccc |
| RIOMV HTN- | gcactaacac  | taact----- | -----tac-  | acatttctac | ctcaaccact | taccctcccc |
| LANV 510B  | gcactaacac  | taact----- | -----tac-  | acatttctac | ctcaaccact | taccctcccc |
| CHOV 588   | -gcttaatac  | taacc----- | -----aca   | acat-tctac | ctcatcccaa | cccctttccc |
| JABV AKM96 | -----tctac  | taa-----   | -----caca  | acat-tctac | ctcaacccea | aaccttcacc |
| MAPV HV-97 | gccttttttac | taaca----- | -----tcaca | acaa--ctac | ctcatcccaa | atcccctccc |
| JUQV oln19 | attgctatac  | taaca----- | -----ctaca | acaacactac | ctcatccaca | -accctccc  |
| JUQV LH    | attgctatac  | taaca----- | -----tcaca | acaacactac | ctcatccaca | -accctccc  |
| PERV 14403 | -gcgctatat  | taacc----- | -----ttaca | acaaagctac | ctcatccata | -accctccc  |
| MACV 13796 | -atgctatac  | taatc----- | -----ataa  | acaaacctac | ctcatccaca | gacccttccc |
| ORNV O1229 | -atgctatac  | taacc----- | -----aca   | acaa-actac | ctcatccaaa | -aacctccc  |
| ORNV AND N | -atgctatac  | taacc----- | -----aca   | acaa-actac | ctcatccaaa | -aacctctc  |
| LECV BMJ-N | -ttgctacac  | taacc----- | -----aaca  | acaacactac | ctcatcccaa | aaccttccc  |
| LECV BMJ-O | -ctgctacac  | taatt----- | -----caca  | acaacactac | ctcatcccaa | aacctcccc  |

|            |            |            |           |            |            |             |
|------------|------------|------------|-----------|------------|------------|-------------|
| LECV Plata | -ttgctacac | taact----- | -----caca | acaaaactac | ctcatccaca | taccctccc   |
| LECV CO22- | -ctgctatat | taact----- | -----caca | acaacactac | ctcatccaca | -aaccctccc  |
| LECV BA18- | -ctgctatat | taact----- | -----caca | acaacactac | ctcatccaca | -accctccc   |
| LECV BA18- | -ctgctatat | taact----- | -----caca | acaacactac | ctcatccaaa | -aaccctccc  |
| LECV ER19- | -ctgctatat | taact----- | -----taca | acaacactac | ctcatccaca | -aaccctccc  |
| LECV 22819 | -ctgctatat | taact----- | -----caca | acaacactac | ctcatccaca | -aaccctccc  |
| BAV BA10-A | -ctgccacac | gagcc----- | -----taca | acaaagctac | cgcatccact | -acgccaaact |
| BAV BA16-L | -ctgctacac | taacc----- | -----taca | acaaaactac | ctcatccact | -accctccc   |
| BAV BA02-C | -ctgctacac | taacc----- | -----taca | acaaaactac | ctcatccact | -accctccc   |
| BAV BA17-S | -ctgctacac | taacc----- | -----taca | acgaaactac | ctcatccact | -accctccc   |
| BAV BA11-A | -ctgctacac | taacc----- | -----taca | acaaaactac | ctcatccact | -accctccc   |
| BAV BA02-C | -ctgctacac | taacc----- | -----taca | acaaaactac | ctcatccact | -accctccc   |
| BAV BA02-C | -ctgctacac | taacc----- | -----taca | acaaaactac | ctcatccact | -accctccc   |
| BAV BA02-C | -ctgctacac | taacc----- | -----taca | acaaaactac | ctcatccact | -accctccc   |
| BAV Hu3969 | -ctgctacac | taacc----- | -----taca | acaaaactac | ctcatccact | -accctccc   |
| ANDV CHI-9 | -tcgcattgc | taacc----- | -----taca | acaagactac | ctcaccct   | -accctccc   |
| ANDV AREB1 | -tcgcattgc | taacc----- | -----taca | acataactac | ctcatccaca | -aaccctccc  |
| ANDV Epuye | -tcgcattgc | taacc----- | -----taca | acataactac | ctcatccaca | -caccctccc  |
| ANDV Epili | -ttgcattgc | taacc----- | -----taca | acataactac | ctcatccaca | -aaccctccc  |
| ANDV NRC-2 | -tcgcattgc | taacc----- | -----taca | acataactac | ctcatccaca | -aaccctccc  |
| ANDV NRC-4 | -tcgcattgc | taacc----- | -----taca | acataactac | ctcatccaca | -aaccctccc  |
| ANDV NRC-6 | -tcgcattgc | taacc----- | -----taca | acataactac | ctcatccaca | -aaccctctc  |

|            |            |            |             |            |            |            |
|------------|------------|------------|-------------|------------|------------|------------|
|            | .... ....  | .... ....  | .... ....   | .... ....  | .... ....  | .... ....  |
|            | 2105       | 2115       | 2125        | 2135       | 2145       | 2155       |
| SNV NM H10 | cttccctatt | acctca---- | acaaaactac  | ctcattataa | gtaaattctt | gattgctttt |
| RIOMV HTN- | ttt--atact | acctca---- | tttattctac  | ctc-ataaat | tttctttctt | gattgctttt |
| LANV 510B  | ttt--atact | acctca---- | tttattctac  | ctc-ataaat | tttctttctt | gattgctttt |
| CHOV 588   | ttta-aaact | acctca---- | attatactac  | ctc-attagt | tttatctctt | gattgctttt |
| JABV AKM96 | ctttaaact  | acctca---- | tttattctac  | ctc-aatagt | gtgttttctt | gattgctttt |
| MAPV HV-97 | cttt-atact | acctca---- | attatactac  | ctcataagtt | --ttattctt | gattgctttt |
| JUQV oIn19 | ctt---aact | acctca---- | acaa-actac  | ctcaaataat | gctttttctt | gattgctttt |
| JUQV LH    | ctt---aact | acctca---- | acaatactac  | ctc-aataat | gctttttctt | gattgctttt |
| PERV 14403 | ctt---ttct | acctca---c | aacatactac  | ctc-acattc | gatttttctt | gattgctttt |
| MACV 13796 | tt-----tct | acctca--aa | aaaatactac  | ctc-gaatat | gatttttctt | gattgcttct |
| ORNV O1229 | ctt---ttct | acctcatctc | aataaaactac | ctc-aatttt | gatttttctt | gattgctttt |
| ORNV AND N | ctt---ttct | acctcatctc | aataaaactac | ctc-aatttt | gatttttctt | gattgctttt |
| LECV BMJ-N | ttt---atct | acctca---t | ataaaaactac | ctc-aatttc | gatttctctt | gattgctttt |
| LECV BMJ-O | ttt---atct | acctca---c | ataaaaactac | ctc-aatttc | gatttctctt | gattgctttt |
| LECV Plata | cta---ttct | acctcatctc | aataaaactac | ctc-aatttt | gatttttctt | gattgctttt |
| LECV CO22- | ctt---ttct | acctca---a | ataaaaactac | ctc-aatttc | gatttctctt | gattgctttt |
| LECV BA18- | ctt---ttct | acctca---a | ataaaaactac | ctc-aatttc | gatttctctt | gattgctttt |
| LECV BA18- | ctt---ttct | acctca---a | ataaaaactac | ctc-aatttt | gatttctctt | gattgc---- |
| LECV ER19- | ctt---ttct | acctca---a | ataaaaactac | ctc-aatttc | gatttctctt | gattgctttt |
| LECV 22819 | ctt---ttct | acctca---a | ataaaaactac | ctc-aattct | gatttctctt | gattgctttt |
| BAV BA10-A | ctt---atca | acctca---c | ataagaatac  | ctc-aagtgc | aatttcac-- | -----      |
| BAV BA16-L | ctt---atct | acctca---a | ataaaaactac | ctc-aaattc | gatttctctt | gattgctttt |
| BAV BA02-C | ctt---atct | acctca---a | ataaaaactac | ctc-aaattc | gatttctctt | gctgtctc-- |
| BAV BA17-S | ctt---atct | acctca---a | ataaaaactac | ctc-aaattc | gatttctctt | gattgcttga |
| BAV BA11-A | ctt---atct | acctca---a | ataaaaactac | ctc-aaattt | gatttctctt | gattgctttt |
| BAV BA02-C | ctt---atct | acctca---a | ataaaaactac | ctc-aaattc | gatttctctt | gattgctttt |
| BAV BA02-C | ctt---atct | acctca---a | ataaaaactac | ctc-aaattc | gatttctctt | gattgctttt |
| BAV BA02-C | ctt---atct | acctca---a | ataaaaactac | ctc-aaattc | gatttctctt | gattgctttt |
| BAV Hu3969 | ctt---atct | acctca---a | ataaaaactac | ctc-acattc | gatttctctt | gattgctttt |
| ANDV CHI-9 | cta---ttct | acctca---a | cacatactac  | ctc-acattt | gatttttctt | gattgctttt |
| ANDV AREB1 | cta---ttct | acctca---a | cacatactac  | ctc-atattt | gatttttctt | gattgctttt |
| ANDV Epuye | cta---ttct | acctca---a | cacatactac  | ctc-atattt | gatttttctt | gattgctttt |
| ANDV Epili | cta---ttct | acctca---a | cacatactac  | ctc-atattt | gatttttctt | gattgctttt |
| ANDV NRC-2 | cta---ttct | acctca---a | cacatactac  | ctc-atattt | gatttttctt | gattgctttt |
| ANDV NRC-4 | cta---ttct | acctca---a | cacatactac  | ctc-atattt | gatttttctt | gattgctttt |
| ANDV NRC-6 | cta---ttct | acctca---a | cacatactac  | ctc-atattt | gatttttctt | gattgctttt |

....|....|    ....|...  
2165                    2175

|            |            |         |
|------------|------------|---------|
| SNV NM H10 | caaggagcat | actacta |
| RIOMV HTN- | caaggagcat | actacta |
| LANV 510B  | caaggagcat | actacta |
| CHOV 588   | caaggagcat | actacta |
| JABV AKM96 | caaggagcat | actacta |
| MAPV HV-97 | caaggagcat | actacta |
| JUQV oln19 | caaggagcat | actacta |
| JUQV LH    | caaggagcat | actacta |
| PERV 14403 | caaggagcat | actacta |
| MACV 13796 | caaggagcat | acta--- |
| ORNV O1229 | caaggagcat | actacta |
| ORNV AND N | caaggagcat | actacta |
| LECV BMJ-N | caaggagcat | aca---- |
| LECV BMJ-O | caaggagcat | actacta |
| LECV Plata | caaggagcat | actacta |
| LECV CO22- | caaggagcat | actacta |
| LECV BA18- | c-----     | -----   |
| LECV BA18- | -----      | -----   |
| LECV ER19- | caaggag--- | -----   |
| LECV 22819 | caaggagcat | actacta |
| BAV BA10-A | -----      | -----   |
| BAV BA16-L | caagg----- | -----   |
| BAV BA02-C | -----      | -----   |
| BAV BA17-S | -----      | -----   |
| BAV BA11-A | ca-----    | -----   |
| BAV BA02-C | caaggagc-- | -----   |
| BAV BA02-C | caaggagc-- | -----   |
| BAV BA02-C | caaggagcat | actacca |
| BAV Hu3969 | caaggagcat | actacta |
| ANDV CHI-9 | caaggagcat | actactt |
| ANDV AREB1 | caaggagcat | actacta |
| ANDV Epuye | ca-----    | -----   |
| ANDV Epili | caaggagcat | acna--- |
| ANDV NRC-2 | caa-----   | -----   |
| ANDV NRC-4 | caaggagca- | -----   |
| ANDV NRC-6 | caaggagc-- | -----   |
